1 **Intimate genetic relationships and fungicide resistance**  
2 **in multiple strains of human pathogenic fungus**  
3 ***Aspergillus fumigatus* isolated from a plant bulb**

4

5 Hiroki Takahashi<sup>1,2,3</sup>, Sayoko Oiki<sup>4</sup>, Yoko Kusuya<sup>1</sup>, Syun-ichi Urayama<sup>4,5</sup>,  
6 Daisuke Hagiwara<sup>4,5,\*</sup>

7

8 <sup>1</sup> Medical Mycology Research Center, Chiba University, 1-8-1 Inohana, Chuo-ku, Chiba  
9 260-8673, Japan

10 <sup>2</sup> Molecular Chirality Research Center, Chiba University, 1-33 Yayoi-cho, Inage-ku,  
11 Chiba 263-8522, Japan

12 <sup>3</sup> Plant Molecular Science Center, Chiba University, 1-8-1 Inohana, Chuo-ku, Chiba  
13 260-8675, Japan

14 <sup>4</sup> Faculty of Life and Environmental Sciences, University of Tsukuba, 1-1-1 Tennodai,  
15 Tsukuba, Ibaraki 305-8577, Japan

16 <sup>5</sup> Microbiology Research Center for Sustainability, University of Tsukuba, 1-1-1  
17 Tennodai, Tsukuba, Ibaraki 305-8577, Japan

18

19 \* Corresponding author: D. Hagiwara

20 [hagiwara.daisuke.gb@u.tsukuba.ac.jp](mailto:hagiwara.daisuke.gb@u.tsukuba.ac.jp)

21

22 Running title

23 Plant bulb-derived azole resistant *A. fumigatus*

24

25 ORCIDs

26 D. Hagiwara: 0000-0003-1382-3914

27 H. Takahashi: 0000-0001-5627-1035

28

## 29 **Summary**

30 Fungal infections are increasingly dangerous because of  
31 environmentally-dispersed resistance to antifungal drugs. Azoles are commonly  
32 used antifungal drugs, but they are also used as fungicides in agriculture, which  
33 may enable enrichment of azole-resistant strains of the human pathogen  
34 *Aspergillus fumigatus* in the environment. Understanding of environmental  
35 dissemination and enrichment of genetic variation associated with azole  
36 resistance in *A. fumigatus* is required to suppress resistant strains. Here, we  
37 focused on eight strains of azole-resistant *A. fumigatus* isolated from a single  
38 tulip bulb for sale in Japan. This set includes strains with  
39 TR<sub>34</sub>/L98H/T289A/I364V/G448S and TR<sub>46</sub>/Y121F/T289A/S363P/I364V/G448S  
40 mutations in the *cyp51A* gene, which showed higher tolerance to several azoles  
41 than strains harboring TR<sub>46</sub>/Y121F/T289A mutation. The strains were typed by  
42 microsatellite typing, single nucleotide polymorphism profiles, and mitochondrial  
43 and nuclear genome analyses. The strains grouped differently using each typing  
44 method, suggesting historical genetic recombination among the strains. Our  
45 data also revealed that some strains isolated from the tulip bulb showed  
46 tolerance to other classes of fungicide, such as QoI and carbendazim, followed  
47 by related amino acid alterations in the target proteins. Considering  
48 spatial-temporal factors, plant bulbs are an excellent environmental niche for  
49 fungal strains to encounter partners, and to obtain and spread  
50 resistance-associated mutations.

51

## 52 Introduction

53 Azoles are versatile compounds that show outstanding activity against a wide  
54 range of fungi, including plant and human pathogens. These compounds play an  
55 essential role in agricultural and clinical settings as fungicides and antifungal  
56 drugs (Fisher et al, 2018, Price et al, 2015). Their main mode of action is  
57 inhibition of the ergosterol biosynthesis pathway by inhibiting Cyp51, which  
58 functions as an 14-alpha-demethylase critical for the biosynthesis. Azole  
59 fungicides, known as demethylase inhibitors (DMIs), include triazole and  
60 imidazole compounds such as tebuconazole, propiconazole, triflumizole, and  
61 prochloraz. They are widely used to protect crops and fruits against pathogens  
62 by application during cultivation and postharvest preservation, as well as for  
63 seed disinfection. In medicine, azole drugs are essential options to combat  
64 dermatophytes and deep-seated fungal pathogens, such as *Trichophyton*  
65 *rubrum* and *Aspergillus fumigatus*, respectively. Azoles are the only class of  
66 compound used to control fungi in both agriculture and medicine.

67 *A. fumigatus* is a major causative agent of aspergillosis and ubiquitously  
68 present in the environment as a saprobe. A limited number of antifungals are  
69 approved for therapy of *A. fumigatus* infection; voriconazole (VRCZ) and  
70 itraconazole (ITCZ) are the first-line drugs for the treatment of pulmonary  
71 infection (Jenks and Hoenigl, 2018). However, this antifungal therapy is  
72 threatened by azole-resistant *A. fumigatus*, strains of which have been  
73 increasingly isolated since the beginning of this century (Howard et al, 2009).  
74 The resistance mechanisms to azole drugs that have been identified in *A.*  
75 *fumigatus* from clinical settings are mutations in Cyp51A, HMG-CoA reductase  
76 HMG1, and a subunit of CCAAT-binding complex HapE, and overexpression of  
77 *cdr1B*, which encodes an ABC transporter (Hagiwara et al, 2016a, Nywening et  
78 al, 2020, Hagiwara et al, 2018, Rybak et al, 2019, Camps et al, 2012,  
79 Hortschansky, et al, 2020, Fraczek et al, 2013). These azole resistance

80 mutations are thought to have emerged during therapy with prolonged azole  
81 treatment.

82 However, in addition to treatment-based resistance, environmentally derived  
83 resistance has been considered as a non-negligible source of azole drug  
84 resistance of *A. fumigatus* during the last decade (Berger et al, 2017, Lestrade et  
85 al, 2019). Typical resistant strains from the environment carry a tandem repeat  
86 (TR) and single-nucleotide polymorphisms (SNPs) in the promoter and coding  
87 regions of the *cyp51A* gene, respectively. The most prevalent variants are  
88 TR<sub>34</sub>/L98H and TR<sub>46</sub>/Y121F/T289A, which were isolated for the first time from  
89 patients in Europe in 1998 and North America in 2008, respectively (Jeanvoine  
90 et al, 2020). The mutants with TR<sub>34</sub> typically show high resistance to ITCZ,  
91 whereas the strains with TR<sub>46</sub> show VRCZ resistance, but some are  
92 pan-azole-resistant strains. These genotypes were later recovered from  
93 environments worldwide (Schoustra et al, 2019, Resendiz et al, 2018, Hagiwara,  
94 2018). Diverse resistant mutants with tandem repeats in the Cyp51A-encoding  
95 gene have been reported (Table 1).

96

97 **Table 1.** Reported Cyp51A variants with tandem repeats in azole-resistant *A.*  
98 *fumigatus*

| Cyp51A allele                      | Country         | References                             |
|------------------------------------|-----------------|----------------------------------------|
| TR <sub>34</sub> /L98H             | Many places     | -                                      |
| TR <sub>46</sub> /Y121F/T289A      | Many places     | -                                      |
| TR <sub>53</sub>                   | Colombia        | Alvarez-Moreno et al, 2017             |
| TR <sub>34</sub> /L98H/S302N       | The Netherlands | Schoustra et al, 2019                  |
| TR <sub>34</sub> /L98H/F495I       | The Netherlands | Schoustra et al, 2019                  |
| TR <sub>34</sub> /L98H/L343H       | The Netherlands | Schoustra et al, 2019                  |
| TR <sub>34</sub> /L98H/E356V       | The Netherlands | Schoustra et al, 2019                  |
| TR <sub>34</sub> /L98H/S297T/F495I | The Netherlands | Schoustra et al, 2019, Cao et al, 2020 |

|                                                        |                                 |                                                                                        |
|--------------------------------------------------------|---------------------------------|----------------------------------------------------------------------------------------|
| TR <sub>34</sub> /L98H/T289A/I364V/G448S               | Japan                           | Nakano et al, 2020, this study                                                         |
| TR <sub>46</sub> /Y121F/T289A/I364V                    | The Netherlands                 | Schoustra et al, 2019                                                                  |
| TR <sub>46</sub> /Y121F/M172I/T289A/G448S              | The Netherlands, Japan,<br>Iran | Zhang et al, 2017, Nakano et al, 2020,<br>Ahangatkani et al, 2020, Fraaije et al, 2020 |
| TR <sub>46</sub> /Y121F/T289A/S363P/I364V/G448S        | The Netherlands, Japan          | Nakano et al, 2020, Fraaije et al, 2020,<br>Zhang et al, 2021, this study              |
| TR <sub>46</sub> <sup>3</sup> /Y121F/M172I/T289A/G448S | The Netherlands, Japan          | Zhang et al, 2017, Nakano et al, 2020                                                  |
| TR <sub>46</sub> <sup>4</sup> /Y121F/M172I/T289A/G448S | The Netherlands                 | Zhang et al, 2021                                                                      |
| TR <sub>92</sub> /Y121F/M172I/T289A/G448S              | The Netherlands                 | Zhang et al, 2021                                                                      |

99

100 Recently, a possible environmental hot spot for azole-resistant *A. fumigatus*  
101 was proposed (Zhang et al, 2017). The TR-type mutants were prevalently  
102 isolated from agricultural compost containing azole fungicide residues, whereas  
103 azole-free compost was dominated by wild-type (WT) *A. fumigatus*. This view  
104 was also supported in other studies (Schoustra et al, 2019, Zhang et al, 2021),  
105 indicating that azole-resistant strains are enriched under the selective pressure  
106 of environmental azoles. The work by Zhang et al. also suggested that sexual  
107 reproduction plays an important role in developing and evolving new *cyp51A*  
108 alleles for drug resistance in compost (Zhang et al, 2017). Taking into  
109 consideration that TR-type drug-resistant *A. fumigatus* mutants show  
110 cross-resistance to DMIs (Snelders et al., 2012), azole-containing environmental  
111 niches may serve as evolutionary incubators through genetic recombination.

112 The propagation of azole-resistant *A. fumigatus* has been studied in an  
113 epidemiological manner using microsatellite analysis by short tandem repeats  
114 for *A. fumigatus* (STRAf), which is a widely accepted intraspecies typing method  
115 with high-resolution discriminatory power (de Valk et al, 2005). TR-type mutant  
116 strains were spread worldwide. Some isolates from multiple countries were  
117 genetically closely related to each other and some had identical microsatellite

118 patterns (Pontes et al, 2020, Cao et al, 2020, Wang et al, 2018, Hagiwara et al,  
119 2016b). Besides such international propagation, intranational clonal expansion  
120 was also reported in several countries (Ahangarkani et al, 2020, Chowdhary et al,  
121 2012). Recent population genomic studies revealed that the azole-resistant  
122 strains are globally distributed. The isolates were divided into two broad clades,  
123 and TR mutants belong to the populations in an uneven manner (Sewell et al,  
124 2019). These data suggest that azole resistance primarily expanded by asexual  
125 and sexual propagation from a limited number of ancestors with TR-type  
126 mutation, rather than locally and independently emerging in each environment.

127 It was recently proposed that resistant *A. fumigatus* strains are transferred  
128 internationally via imported plant bulbs (Dunne et al, 2017). Plant bulbs  
129 produced in the Netherlands and sold in Ireland were contaminated with TR-type  
130 *A. fumigatus* mutants. Similar cases were also reported by two independent  
131 Japanese groups (Hagiwara 2020, Nakano et al, 2020); azole-resistant *A.*  
132 *fumigatus* with diverse Cyp51A variants were isolated from plant bulbs that were  
133 imported from the Netherlands and sold in Japanese gardening shops. These  
134 studies suggest that the wide spread of azole-resistant *A. fumigatus* mutants is  
135 attributable in part to trade in agricultural products including plant bulbs.

136 In the present study, to further understand genetic variations in plant  
137 bulb-associated isolates, we focused on eight *A. fumigatus* strains that were  
138 co-isolated from a single tulip bulb in a previous screening study (Hagiwara,  
139 2020). Sensitivity to medical and agricultural azoles, as well as other classes of  
140 fungicides, was compared between the strains. Whole genome comparison of  
141 the eight strains showed several fragmental overlaps of their genomes,  
142 suggesting genetic recombination had occurred between strains in the single  
143 bulb. Our work indicates that plant bulbs are not only a vehicle for the pathogen  
144 but also a place where the pathogen can evolve its drug resistance.

145

## 146 Results

### 147 Variation of Cyp51A mutation in strains from a single bulb

148 In a previous study, eight strains of *A. fumigatus* were isolated from a single tulip  
149 bulb as different colonies (hereafter referred to as strains 3-1-A to 3-1-H)  
150 (Hagiwara, 2020). Strain 3-1-H has no TR or SNPs in *cyp51A*, whereas TR<sub>34</sub> or  
151 TR<sub>46</sub> occur in combination with various SNPs in the other seven strains (Table 2).  
152 Strains 3-1-A, 3-1-E, 3-1-F, and 3-1-G have a typical variant, TR<sub>46</sub>/Y121F/T289A.  
153 Strain 3-1-D has mutations S363P, I364V, and G448S as well as  
154 TR<sub>46</sub>/Y121F/T289A. Strains 3-1-B and 3-1-C have TR<sub>34</sub>/L98H and mutations  
155 T289A, I364V, and G448S. Notably, TR<sub>34</sub>/L98H and G448S are known to play a  
156 role in azole resistance, and T289A is typically accompanied by TR<sub>46</sub> (Hagiwara  
157 et al, 2016a). Thus, the Cyp51A of strains 3-1-B and 3-1-C showed complicated  
158 sequence variation, including three mutations related to azole resistance.  
159

**Table 2.** Cyp51A variation and microsatellite typing of the strains in this study

| Strain ID | Cyp51A variation                                    | 2A | 2B | 2C | 3A | 3B | 3C | 4A | 4B | 4C |
|-----------|-----------------------------------------------------|----|----|----|----|----|----|----|----|----|
| 3-1-A     | TR <sub>46</sub> /Y121F, T289A                      | 10 | 20 | 8  | 44 | 9  | 10 | 8  | 10 | 7  |
| 3-1-B     | TR <sub>34</sub> /L98H, T289A, I364V, G448S         | 23 | 10 | 9  | 35 | 9  | 6  | 8  | 10 | 18 |
| 3-1-C     | TR <sub>34</sub> /L98H, T289A, I364V, G448S         | 23 | 10 | 9  | 35 | 9  | 6  | 8  | 10 | 18 |
| 3-1-D     | TR <sub>46</sub> /Y121F, T289A, S363P, I364V, G448S | 24 | 20 | 12 | 45 | 9  | 11 | 8  | 10 | 18 |
| 3-1-E     | TR <sub>46</sub> /Y121F, T289A                      | 26 | 20 | 12 | 36 | 9  | 22 | 8  | 14 | 31 |
| 3-1-F     | TR <sub>46</sub> /Y121F, T289A                      | 25 | 20 | 12 | 45 | 11 | 6  | 10 | 12 | 18 |
| 3-1-G     | TR <sub>46</sub> /Y121F, T289A                      | 23 | 10 | 9  | 36 | 9  | 6  | 12 | 10 | 7  |
| 3-1-H     | wt                                                  | 23 | 19 | 15 | 33 | 11 | 7  | 13 | 9  | 5  |

160

### 161 Varied sensitivity to azoles in the strains from a single bulb

162 As previously reported, strains 3-1-A to G, which have TRs in *cyp51A*, showed  
163 VRCZ resistance (>32 µg/ml) in minimum inhibitory concentration tests  
164 (Hagiwara, 2020). To further understand the susceptibility to azole drugs, colony  
165 growth was evaluated on potato-dextrose-agar (PDA) containing 10 µg/ml of  
166 VRCZ (Fig. 1A). Strains 3-1-B, 3-1-C, and 3-1-D were more tolerant to VRCZ  
167 than the other strains. When grown on medium containing DMIs (triflumizole,  
168 imazalil, prochloraz, tebuconazole, epoxiconazole, or difenoconazole), strain  
169 3-1-H, which harbors WT *Cyp51A*, showed the greatest growth inhibition among  
170 the strains. Strains 3-1-B, 3-1-C, and 3-1-D were less affected by the DMIs  
171 (except prochloraz) (Fig. 1B). On the basis of colony diameter measurement,  
172 strains 3-1-B, 3-1-C and 3-1-D showed higher tolerance to VRCZ and DMIs than  
173 strains 3-1-A, 3-1-E, 3-1-F, and 3-1-G (Fig. 1C). These results suggest that the  
174 combination of TR and G448S mutation increases resistance to azole  
175 compounds.

176 The expression levels of genes related to azole resistance were examined in  
177 the eight strains by quantitative real-time (qRT)-PCR. Compared with strain  
178 3-1-H, which has the WT *cyp51A* gene, strains with a TR in the *cyp51A* gene  
179 showed higher expression of *cyp51A* (Fig. 2A). Overexpression of *cdr1B*, which  
180 encodes an ABC transporter, has been reported to confer azole resistance.  
181 Thus, the expression level of *cdr1B* was also determined in the eight strains by  
182 qRT-PCR. Strains 3-1-B and 3-1-C showed relatively high expression levels of  
183 *cdr1B* (Fig. 2B).

184

### 185 **Microsatellite typing analysis of tulip bulb isolates**

186 To investigate the genetic relationships between the eight strains co-isolated  
187 from a single tulip bulb, microsatellite analysis using STRA<sub>f</sub> was performed  
188 (Table 2). This analysis also included TR-type strains that were previously  
189 reported and isolated in different countries and strains isolated from plant bulbs



190 in Japan (Nakano et al, 2020, Hagiwara, 2020) (Fig. 3). Among the eight strains,  
191 the STRAf patterns of 3-1-B and 3-1-C matched perfectly. Strain 3-1-D is closely  
192 related to them, as this strain contains the same number of STRs in 4 of the 9  
193 panels. Similarly, strain 3-1-D shares the same number of STRs as strain 3-1-F  
194 in 4 of the 9 panels. These four strains grouped into the same clade. The other  
195 strains were distantly positioned in the dendrogram. Interestingly, some strains  
196 that were isolated from plant bulbs in the study by Nakano et al. (2020) showed  
197 a close relationship with our strains. NGS-ER15 had an STR pattern similar to  
198 that of our strains 3-1-B and 3-1-C (5 of the 9 panells), which is consistent with  
199 these strains having the same Cyp51A allele (TR<sub>34</sub>/L98H/T289A/I364V/G448S).  
200 Strains NGS-ER6 and NGS-ER7 of Nakano et al. (2020) are closely related to  
201 strains 3-3-A and 3-3-B that were isolated from a single another tulip bulb in our  
202 previous study (Hagiwara, 2020). Note that these extraordinarily close relatives  
203 were isolated from plant bulbs in different laboratories.

204

### 205 **Genome sequencing and comparison between strains**

206 To gain more insight into genetic differences or relatedness, genomes of the  
207 eight strains (3-1-A to H) were sequenced using the Illumina platform. Complete  
208 mitochondrial genomes were successfully obtained for the strains (31,749 to  
209 31,770 base pairs [bp] long) (Table 3). A phylogenetic tree was constructed  
210 using the mitochondrial genomes and those of other strains (IFM 61407, IFM  
211 59365, and IFM 61578) that had been clinically isolated in Japan  
212 (Takahashi-Nakaguchi et al, 2015) (Fig. 4A). This dendrogram indicated that the  
213 eight strains isolated from the tulip bulb can be divided into three groups. Group  
214 m1 contains strains 3-1-A, 3-1-D, and 3-1-G; strains 3-1-B, 3-1-C, 3-1-E, and  
215 3-1-F are in Group m2. Strain 3-1-H was distantly positioned from both Group  
216 m1 and m2. Differences in the length of the mitochondrial genome well reflect  
217 the grouping, suggesting that strains within each group are very close relatives.

**Table 3.** Results of genome sequencing for strains isolated from a single tulip bulb

| <b>Strain ID</b> | <b>Total length of chromosomes [bp]</b> | <b>GC [%]</b> | <b># of proteins</b> | <b>Mitochondrial genome [bp]</b> | <b>Mito Group</b> | <b>CSP type</b> | <b>Mating type</b> |
|------------------|-----------------------------------------|---------------|----------------------|----------------------------------|-------------------|-----------------|--------------------|
| 3-1-A            | 28,889,155                              | 49.342        | 9,492                | 31,770                           | m1                | t02             | <i>mat1-1</i>      |
| 3-1-B            | 28,519,682                              | 49.352        | 9,359                | 31,763                           | m2                | t02             | <i>mat1-1</i>      |
| 3-1-C            | 28,533,261                              | 49.355        | 9,490                | 31,763                           | m2                | t02             | <i>mat1-1</i>      |
| 3-1-D            | 29,087,830                              | 49.324        | 9,515                | 31,770                           | m1                | t02             | <i>mat1-1</i>      |
| 3-1-E            | 28,703,796                              | 49.398        | 9,464                | 31,763                           | m2                | t02             | <i>mat1-1</i>      |
| 3-1-F            | 28,808,510                              | 49.492        | 9,537                | 31,763                           | m2                | t02             | <i>mat1-2</i>      |

218 In the microsatellite typing analysis described above, strains 3-1-B, 3-1-C, 3-1-D,  
219 and 3-1-F were grouped into the same clade, but this was inconsistent with the  
220 grouping based on mitochondrial genomes, in which strain 3-1-D was not in the  
221 same group as strains 3-1-B, 3-1-C, and 3-1-F.

|       |            |        |       |        |    |     |               |
|-------|------------|--------|-------|--------|----|-----|---------------|
| 3-1-G | 29,178,518 | 49.295 | 9,543 | 31,770 | m1 | t02 | <i>mat1-1</i> |
| 3-1-H | 28,716,638 | 49.611 | 9,617 | 31,749 | m3 | t01 | <i>mat1-1</i> |

222 Nuclear genomes of the eight strains were compared with the reference  
223 genome of *A. fumigatus* strain Af293 (retrieved from AspGD,  
224 <http://www.aspgd.org/>) ; 92.2% to 93.6% of the Af293 genome was covered in  
225 the eight strains, and 69,949 to 79,391 SNPs were detected the genomes of the  
226 eight strains compared with the sequence of Af293 (Table 4). Phylogenetic  
227 analysis of the eight strains and previously-sequenced strains was performed by  
228 using concatenated sequences of the SNP positions (Takahashi-Nakaguchi et al,  
229 2015) (Fig. 4B). Among the eight strains, 3-1-H was distantly positioned in the  
230 dendrogram as an independent clone. The other seven strains showed  
231 moderately close genetic-relatedness to each other based on comparison with  
232 the apparently independent clinical strains. Strains 3-1-B and 3-1-C showed the  
233 closest relationship, which was supported by the lowest number (6,241) of SNPs  
234 between strains (Table 4). This is consistent with the results of microsatellite and  
235 mitochondrial genome typing. Nevertheless, in the mitochondrial genome typing,  
236 strain 3-1-E was in Group m2 with strains 3-1-B, 3-1-C, and 3-1-F; however,  
237 strain 3-1-E was relatively distant from these three strains in phylogenetic  
238 analysis based on the nuclear genome (Fig. 4C).

239 From the genome sequences, CSP typing was performed, which can typify  
240 strains by sequence variation at a single locus (*csp*: Afu3g08990) (Klaassen et al,  
241 2009). The results showed that seven strains (3-1-A to 3-1-G) carried an  
242 identical type (t02), but strain 3-1-H strain had type t01. Sequence analysis for  
243 mating type revealed that all but strain 3-1-F harbored *mat1-1*, whereas 3-1-F  
244 carried *mat1-2* (Table 3).

245

246 **Comparison of genome-wide SNP frequency pattern**

247 Inconsistency in strain typing among the typing methods using the mitochondrial  
 248 and chromosomal genome sequences caused us to speculate that genetic  
 249 recombination had occurred between the strains isolated from the single tulip  
 250 bulb. To help test this hypothesis, the SNP frequency and distribution were  
 251 investigated and compared among the strains in a genome-wide manner (Fig.  
 252 S1). There were several regions where the patterns of SNP frequency markedly  
 253 differed among the strains (Fig.

**Table 4.** Summary of SNPs in strains isolated from a single tulip bulb.

| Strain ID | % of covered positions *1 | # of SNPs *1 | 3-1-A  | 3-1-B  | 3-1-C  | 3-1-D  | 3-1-E  | 3-1-F  | 3-1-G  | 3-1-H |
|-----------|---------------------------|--------------|--------|--------|--------|--------|--------|--------|--------|-------|
|           |                           |              | 3-1-A  | 92.7%  | 74,865 |        |        |        |        |       |
| 3-1-B     | 92.2%                     | 77,715       | 46,380 |        |        |        |        |        |        |       |
| 3-1-C     | 92.2%                     | 77,879       | 46,296 | 6,241  |        |        |        |        |        |       |
| 3-1-D     | 93.3%                     | 78,394       | 38,184 | 46,181 | 46,244 |        |        |        |        |       |
| 3-1-E     | 92.6%                     | 76,218       | 50,656 | 56,072 | 55,902 | 59,081 |        |        |        |       |
| 3-1-F     | 93.0%                     | 75,553       | 40,062 | 45,535 | 45,284 | 52,533 | 54,507 |        |        |       |
| 3-1-G     | 93.0%                     | 79,391       | 32,777 | 36,509 | 36,566 | 36,517 | 57,646 | 44,451 |        |       |
| 3-1-H     | 93.6%                     | 69,949       | 95,960 | 91,751 | 91,720 | 88,448 | 89,321 | 92,982 | 93,204 |       |

\*1 These are relative to the genome of reference strain *A. fumigatus* Af293.

**Table 5.** The number of orthologous genes in the strains isolated from a single tulip bulb compared with reference strain *A. fumigatus* Af293.

| Chromosome | # of orthologous genes compared with strain Af293 |
|------------|---------------------------------------------------|
|            |                                                   |

|       | Af293 | 3-1-A | 3-1-B | 3-1-C | 3-1-D | 3-1-E | 3-1-F | 3-1-G | 3-1-H |
|-------|-------|-------|-------|-------|-------|-------|-------|-------|-------|
| chr1  | 1,642 | 1,369 | 1,355 | 1,377 | 1,371 | 1,369 | 1,365 | 1,370 | 1,370 |
| chr2  | 1,640 | 1,433 | 1,406 | 1,425 | 1,425 | 1,411 | 1,436 | 1,427 | 1,433 |
| chr3  | 1,395 | 1,163 | 1,163 | 1,169 | 1,179 | 1,152 | 1,173 | 1,179 | 1,189 |
| chr4  | 1,253 | 1,089 | 1,075 | 1,093 | 1,090 | 1,098 | 1,096 | 1,085 | 1,095 |
| chr5  | 1,367 | 1,151 | 1,156 | 1,160 | 1,153 | 1,153 | 1,162 | 1,156 | 1,153 |
| chr6  | 1,249 | 1,068 | 1,067 | 1,074 | 1,058 | 1,069 | 1,073 | 1,070 | 1,080 |
| chr7  | 651   | 490   | 478   | 476   | 483   | 489   | 493   | 494   | 489   |
| chr8  | 628   | 502   | 496   | 507   | 497   | 505   | 506   | 491   | 513   |
| Total | 9,825 | 8,265 | 8,196 | 8,281 | 8,256 | 8,246 | 8,304 | 8,272 | 8,322 |

254 S1). For example, regions 5-A, 5-B, and 5-C on chromosome 5 were  
255 particularly characteristic (Fig. 5A). In region 5-A, strains 3-1-A, 3-1-E, and 3-1-H  
256 showed similar patterns of SNP frequency. In region 5-B, the pattern of strain  
257 3-1-A was similar to that of strains 3-1-F and 3-1-H. In region 5-C, the pattern of  
258 strain 3-1-A was similar to that of strains 3-1-E, 3-1-G, and 3-1-H. These results  
259 indicate that strain 3-1-A shares parts of the sequence of chromosome 5 with  
260 strains 3-1-E, 3-1-F, 3-1-G, and 3-1-H. Such intergenomic variations were also  
261 found on other chromosomes (Fig. 5B, Fig. S1). These results showed a  
262 genome-wide mosaic pattern of SNP frequency, which is indicative of genetic  
263 recombination events in the strains.

264

### 265 **Comparing genome-wide distribution of orthologous genes**

266 To further investigate genome shuffling in the strains, we compared the  
267 patterns of orthologous among the strains isolated from the tulip bulb. First, the  
268 genes shared with the reference genome of *A. fumigatus* strain Af293 were  
269 investigated based on reciprocal blast hits (RBHs), which resulted in the isolates  
270 containing 8,196 to 8,322 orthologs of genes in strain Af293 (Table 5). The  
271 positions of the orthologs were generally evenly distributed in the strains,

272 although fewer orthologs were found on chromosome 7. Notably, different  
273 patterns of ortholog content were displayed in some regions of the genomes of  
274 the various strains (Fig. 6). I.e., some sets of strains have lost particular sets of  
275 genes, and other sets of genes have been lost in other sets of strains. Hence,  
276 the set of strains that shares an ortholog pattern is different at each locus (Fig. 6).  
277 This suggests repeated genome shuffling among the strains.

278

### 279 **Varied tolerance to agricultural fungicides**

280 As these strains were derived from a horticultural product, they may have been  
281 exposed to agricultural fungicides besides DMIs. Hence, the susceptibility of the  
282 eight strains to QoI (pyraclostrobin), SDHI (boscalid), methyl benzimidazole  
283 carbamate (carbendazim), and phenylpyrrole (fludioxonil) was evaluated on  
284 PDA plates. There was no significant difference among the strains in  
285 susceptibility to fludioxonil and boscalid (Fig. 7A&B). However, the colony of  
286 strain 3-1-H was smaller than those of the other seven strains on the medium  
287 containing pyraclostrobin or carbendazim. These results suggest that there is  
288 varied tolerance to pyraclostrobin and carbendazim among the strains.

289 From the genome sequences, mutations that are possibly responsible for  
290 tolerance to carbendazim and pyraclostrobin were searched in the target  
291 molecules tubulin and cytochrome b that are encoded by *tubA* (Afu1g10910) and  
292 *cytB* (AfuMt00001), respectively (Fig. 6C). The amino acid substitution F219Y  
293 was found in TubA of strains 3-1-A to 3-1-G. This substitution has been reported  
294 in several carbendazim-resistant strains of plant pathogenic fungi (Yarden and  
295 Katan, 1993, Zhou et al, 2020). To investigate how the mutation is distributed in  
296 human pathogenic *A. fumigatus* genomes, the SNP database in FungiDB was  
297 explored. According to the dataset, 18% (14 of 77 strains) of *A. fumigatus*  
298 contain F219Y in TubA. Notably, eight of the 77 strains were isolated from the  
299 environment, and four of these possess the amino acid substitution.

300 In CytB, mutations V13I and G143A were found in strains 3-1-A to 3-1-G,  
301 and V119I was found in 3-1-H. G143A in CytB has been reported to confer the  
302 resistance to QoI in many plant pathogenic fungi (Samuel et al, 2011, Bolton et  
303 al, 2012), suggesting that this mutation in *A. fumigatus* is related to low  
304 sensitivity to QoI fungicide. As mitochondrial genome sequences are scarce in  
305 public databases, we investigated the sequence of the *cytb* gene in nine strains  
306 that were clinically isolated in a previous study and whose mitochondrial genome  
307 sequence is at least partly available (Takahashi-Nakaguchi et al, 2015). Among  
308 these nine strains, no G143A mutation was observed, whereas seven of the  
309 strains contain V119I (as also observed in our strain 3-1-H).

310

## 311 Discussion

312 The distribution of azole-resistant *A. fumigatus* in natural environments has  
313 drawn increasing attention in recent years, with special interest in where the  
314 resistant strains have emerged, inhabit, and have been translocated to. However,  
315 deep understanding is still lacking. In this work, to fill in gaps in knowledge, we  
316 focused on strains that were isolated from a single tulip bulb.

317 Sexual reproduction of *A. fumigatus* was demonstrated in laboratory  
318 conditions in 2009 (O'Gorman et al., 2009). After this discovery, researchers  
319 paid more attention to the pan-genome of clinical isolates of this pathogenic  
320 fungus. However, gene flow in the environment has been poorly studied.  
321 Population genetics study using linkage disequilibrium analysis for genetic  
322 markers supported the view that *A. fumigatus* reproduces asexually and sexually  
323 in natural habitats (Klaassen et al., 2012). However, although there is  
324 accumulating evidence for genetic recombination in nature, proving the  
325 occurrence of sexual reproduction is difficult unless one can directly collect  
326 cleistothecia and ascospores formed in the environment. Genetic recombination  
327 in sexual development is suggested to cause the emergence of TR mutation in

328 *cyp51A* gene through unequal crossover (Zhang et al., 2017). Thus, sexual  
329 reproduction is considered both to spread mutations by fusion with other strains  
330 and production of progeny, and to locally produce *de novo* TR mutations, which  
331 could affect the prevalence of resistance to drugs and fungicides. Our data show  
332 that seven of the eight isolates from a single tulip bulb contain TR mutations, and  
333 the genetic variation between the TR-containing strains is low compared with  
334 that between apparently independent strains. In addition, on the basis of  
335 genome-wide distributions of SNPs and orthologous genes, genetic  
336 recombination is likely to have occurred between the seven strains.

337 Co-isolation of the strains from a single bulb indicates that they have had  
338 much opportunity to physically interact with each other inside or on the bulb. In  
339 addition to the close spatial relationship of the fungal strains, they may interact  
340 for a long time. In the conventional process of plant bulb production, bulbs are  
341 multiplied from a parental bulb. This bulb multiplication is continued every year,  
342 which presumably causes the sustained presence of the fungi on/inside the  
343 bulbs. As described here, several strains were attached to a single bulb. These  
344 strains might have encountered others and genetically mixed many times. Once  
345 mutations giving rise to resistance to azoles emerged, the mutations could be  
346 preferentially and stably retained in the microbial community inside the bulb.

347 Sequencing analysis of the eight strains produced complete mitochondrial  
348 genomes and chromosomal genomes. The mitochondrial genome was of great  
349 help in interpreting whether there had been sexual reproduction among the  
350 strains. On the basis of mitochondrial genome sequences, the strains with TR  
351 mutation can be classed into Groups m1 and m2 (Fig. 4A). The length and  
352 sequences of the mitochondrial genomes are highly conserved in each group,  
353 indicating that they are genetically close progenies. However, the chromosomal  
354 genomes were diverse among the strains with TR mutation to the extent that  
355 there were 32,000 to 59,000 SNPs, excepting strains 3-1-B and 3-1-C which had



356 approximately 6,200 SNPs (Table 4). The differences in grouping based on  
357 mitochondrial and chromosomal genomes strongly suggested a genetic  
358 recombination event. We therefore propose that the complete mitochondrial  
359 genome is valuable for gaining deeper insight into genetic relatedness among  
360 and between environmental and clinical isolates.

361 Strains with complicated *cyp51A* alleles have been reported in the literature  
362 and this paper (Table 1). For instance, we have isolated *A. fumigatus* strains  
363 with TR<sub>34</sub>/L98H/T289A/I364V/G448S (3-1-B and 3-1-C) and  
364 TR<sub>46</sub>/Y121F/T289A/S363P/I364V/G448S (3-1-D) mutations in the *cyp51A* gene.  
365 TR<sub>34</sub>/L98H is a typical TR-type mutation conferring resistance to ITCZ and in  
366 some cases to VRCZ, whereas TR<sub>46</sub>/Y121F/T289A confers resistance to VRCZ  
367 and in most cases to ITCZ (van Ingen et al, 2015, Buil et al, 2018). Amino acid  
368 substitution G448S contributes to resistance to VRCZ and occasionally to ITCZ  
369 (Bellele et al, 2010, Toyotome et al, 2016, Cao et al, 2020). Our finding that  
370 three strains (3-1-B, 3-1-C, and 3-1-D) showed a higher tolerance to VRCZ and  
371 some DMIs than strains with only TR<sub>46</sub>/Y121F/T289A mutation is suggestive of  
372 elevation of tolerance to azole drugs by combining mutations. Importantly,  
373 strains with G448S mutation have been isolated not only from clinical samples  
374 but also from soil (Cao et al, 2020). We cannot rule out the possibility that the  
375 G448S mutation originally emerged and was retained in strains with  
376 TR<sub>46</sub>/Y121F/T289A under the selective pressure of fungicides.

377 The *A. fumigatus* strains used in the present work were isolated from a tulip  
378 bulb by culturing at 45°C on plates containing medium supplemented with  
379 fluconazole to select fungi that were resistant to fluconazole (Hagiwara 2020). In  
380 total in that study, *A. fumigatus* was isolated from 50.8% of tulip bulbs (96/189),  
381 and strains isolated from 20.6% of the bulbs (39/189) had TR mutation. Because  
382 *A. fumigatus* is a saprophytic fungus that widely inhabits soil, compost, plant  
383 debris, wood chips, the air, and aquatic environments, it was not surprising that

384 half of the tulip bulbs were contaminated with *A. fumigatus*. However, we have  
385 no idea how the fungus resides on or inside the bulbs from a biological viewpoint.  
386 Because of the high frequency of *A. fumigatus* isolation from tulip bulbs, there  
387 might be certain mechanisms by which *A. fumigatus* colonizes and infects the  
388 plant tissue, enabling persistence across bulb progenies. Notably, some *A.*  
389 *fumigatus* strains were isolated from *Citrus macrocarpa*, *Myricaria laxiflora*,  
390 *Ligusticum wallichii*, and *Moringa oleifera* (Francisco et al, 2020, Qin et al, 2019,  
391 Li et al, 2020, Arora and Kaur, 2019) as an endophyte. In general, however, the  
392 view that *A. fumigatus* has an endophytic mode in its life cycle remains to be  
393 established. In consideration of the dynamic mobilization of *A. fumigatus* in the  
394 environment, its association with plants may be overlooked, and we should pay  
395 more attention to it.

396 Recently, several field studies were published in which the prevalence of  
397 azole-resistant *A. fumigatus* was investigated in association with fungicide use.  
398 Work by Zhou et al. (2021) demonstrated that the concentration of triazoles in  
399 the soil of greenhouses was not significantly correlated with azole susceptibility  
400 of isolates. In another study from Germany, a low frequency of azole-resistant  
401 isolates from crop fields was reported regardless of azole fungicide use (Barber  
402 et al, 2020). A study by Frasiје et al. (2020) also reported a low number of  
403 azole-resistant isolates in the soils of wheat-cropping fields subjected to  
404 fungicide treatment. The authors considered that arable crop production is low  
405 risk for development of azole resistance. Conversely, a large-scale survey  
406 across China was conducted, which showed that the residual level of azole  
407 fungicides in paddy soils positively correlated with the prevalence of  
408 azole-resistant *A. fumigatus* (Cao et al, 2021). Field research on azole-resistant  
409 *A. fumigatus* has started in many countries. More studies are required on the  
410 effects of fungicide use on the occurrence and spread of azole-resistant *A.*  
411 *fumigatus* in the environment, including agricultural and horticultural settings.

412 In plant bulbs, there may be other pathogenic and nonpathogenic fungi  
413 beside *A. fumigatus*. They are also exposed to fungicides when the bulbs are  
414 treated with fungicide. Repeated use of fungicides would facilitate the  
415 occurrence of resistance mutations in non-targeted fungi as well as in the target  
416 fungi of the pesticide. In the present study, we found that mutations in CytB and  
417 TubA that are related to resistance to Qol and carbendazim fungicides,  
418 respectively, were detected in *A. fumigatus* strains as an example of non-target  
419 fungi. These mutations might have been resulted from fungicide exposure during  
420 bulb production. Importantly, identical mutations of *A. fumigatus* were reported  
421 by Fraaije *et al.* (2020) and are found in database. These findings suggest that  
422 mutations related to resistance to antifungal agents are already present in the  
423 genomes of environmental fungi regardless of their pathogenicity. The boundary  
424 between acquired and natural resistance to antifungal compounds may become  
425 unclear in the near future.

426

## 427 **Materials and Methods**

### 428 ***Strains and culture conditions***

429 Strains 3-1-A to 3-1-H used in this study were obtained in previous study and  
430 were isolated from a single tulip bulb (Hagiwara, 2020). For plate and liquid  
431 cultures, PDA and potato-dextrose broth (PDB) were used, respectively. For  
432 colony growth tests,  $10^5$  conidia of each strain were inoculated and incubated for  
433 48 h at 37°C before taking pictures. Insusceptibility tests, 10 µg/ml VRCZ,  
434 imazalil, prochloraz, triflumizole, tebuconazole, epoxiconazole, and  
435 difenoconazole were respectively added to PDA. The control plate contained the  
436 equivalent volume of dimethylsulfoxide (DMSO). For measuring colony diameter,  
437 the culture time was 28 or 30 h. The data were obtained in triplicate, and the  
438 mean and standard deviation are presented. The fungicides fludioxonil,

439 carbendazim, boscalid, and pyraclostrobin were used at 0.2 µg/ml, 5 µg/ml, 2.5  
440 µg/ml, and 10 µg/ml, respectively.

441

#### 442 ***Quantitative real-time RT-PCR***

443 Strains were cultured in PDB at 37°C for 18 h and harvested. The mycelia were  
444 frozen in liquid nitrogen, and total RNA was isolated using Sepasol Super G  
445 (Nacalai Tesque, Kyoto, Japan). cDNA was obtained by reverse transcription  
446 reaction using the total RNA sample and ReverTra Ace qPCR RT Master Mix  
447 with gDNA remover (TOYOBO, Osaka, Japan).

448 Real-time RT-PCR was performed using Brilliant III Ultra-Fast SYBR Green  
449 QPCR Master Mix (Agilent Technologies, Inc., Santa Clara, CA, USA) as  
450 described previously (Ninomiya et al, 2020). Relative expression ratios were  
451 calculated using the comparative cycle threshold (Ct) method. The  
452 actin-encoding gene was used as a normalization reference. Each sample was  
453 tested in triplicate, and the standard deviation is presented. The primer sets  
454 used were described in Hagiwara et al, 2017.

455

#### 456 ***Microsatellite typing***

457 Microsatellite typing was performed as described previously (Hagiwara et al,  
458 2014). Briefly, nine microsatellite regions of approximately 400 bp were PCR  
459 amplified using purified genome DNA as a template and sequenced by the  
460 Sanger method. The repeat numbers of each locus were counted from the  
461 sequences. A dendrogram was constructed using Cluster 3.0 by hierarchical  
462 clustering with City-block distance for average linkage, and drawn using  
463 Treeview ver. 1.1.6r2 (de Hoon et al, 2004, Saldanha, 2004).

464

#### 465 ***Genome sequencing***

466 Whole-genome sequencing using next-generation methods was performed as  
467 described previously (Hagiwara et al., 2018). In brief, we extracted genomic  
468 DNA from overnight-cultured mycelia with NucleoSpin Plant II (Takara Bio,  
469 Shiga, Japan). For paired-end library preparation, an NEBNext Ultra DNA  
470 Library Prep Kit (New England BioLabs, MA, USA) and NEBNext Multiplex  
471 Oligos (New England BioLabs) were used in accordance with the manufacturer's  
472 instructions. A total of 11 strains including 3-1-A to 3-1-H, IFM 59365, IFM 61407,  
473 and IFM 61578 were sequenced. Paired-end sequencing (150-bp) on a HiSeq  
474 4000 system (Illumina, San Diego, CA, USA) was carried out by GENEWIZ  
475 (South Plainfield, NJ, USA).

476

#### 477 ***SNP detection***

478 In addition to the abovementioned 11 strains, we used raw data for seven strains  
479 for comparison, which have been taken in a study by Takahashi-Nakaguchi et al  
480 (2015). Adapters and low-quality bases from Illumina reads were trimmed by  
481 fastp (ver. 0.20.1) (Chen et al., 2018). Filtered reads were aligned against the *A.*  
482 *fumigatus* strain Af293 reference genome using BWA (ver. 0.7.17-r1188) (Li and  
483 Durbin 2009). SNP detection was performed as described previously (Hagiwara  
484 et al., 2018). Briefly, SNPs were identified by using SAMtools (ver. 1.9) (Li et al.,  
485 2009) and filtered with >20-fold coverage, >30 mapping quality, and 75%  
486 consensus using in-house scripts (Suzuki et al., 2014; Tenailon et al., 2012).

487

#### 488 ***Phylogenetic tree construction***

489 Among the strains that were sequenced, mitochondrial genomes of 12 strains  
490 were available and aligned by MAFFT (ver. 7.475) (Kato and Standley, 2013).  
491 A phylogenetic tree was constructed using multithreaded RAxML (ver. 8.2.12)  
492 (Stamatakis, 2014), the GTRCAT model, and 1,000 bootstrap replicates, and  
493 visualized by iTOL (Letunic and Bork 2019). For chromosomal genome

494 phylogenetic classification, 90,987 polymorphic loci were predicted from 18  
495 strains and concatenated, then used for construction of a phylogenetic tree by  
496 the methods described above.

497

#### 498 ***Genome assembly and gene prediction***

499 Mitochondrial genomes were assembled and annotated using GetOrganelle (ver.  
500 1.6.4) (Jin et al., 2020) and MITOS2 (Bernt et al., 2013), respectively. To filter  
501 the mitochondrial reads, trimmed reads were aligned against mitochondrial  
502 genomes by BWA (ver. 0.7.17-r1188) (Li and Durbin, 2009), and the mapped  
503 reads were filtered by SAMtools (ver. 1.9) (Li et al., 2009) and SeqKit (Shen et  
504 al., 2016). Contigs were assembled by VelvetOptimiser (ver. 2.2.6) (Zerbino and  
505 Birney 2008), followed by generation of a simulated mate-paired library using  
506 wgsim (ver. 0.3.1-r13) (<https://github.com/lh3/wgsim>). The assembly of nuclear  
507 genomes was carried out by ALLPATHS-LG (ver. R52488) (Gnerre et al., 2011).  
508 The annotation of assembled nuclear genomes was performed by the  
509 Funannotate pipeline (ver. 1.7.4) (<https://funannotate.readthedocs.io/en/latest/>)  
510 as described previously (Takahashi et al., 2021). Following identification of  
511 repeat sequences by RepeatModeler (ver. 1.0.11)  
512 (<http://www.repeatmasker.org/RepeatModeler.html>) and RepeatMasker (ver.  
513 4.0.7) (<https://www.repeatmasker.org>), Funannotate *ab initio* prediction was  
514 performed with the option “--busco\_seed\_species=aspergillus\_fumigatus” by  
515 Augustus (ver. 3.3.3) (Stanke et al., 2006), GeneMark-ES (ver. 4.38)  
516 (Ter-Hovhannisyann et al., 2008), GlimmerHMM (ver. 3.0.4) (Majoros et al., 2004),  
517 and SNAP (ver. 2006-07-28) (Ian, 2004) using exon hints from the proteins of *A.*  
518 *fumigatus* Af293 and *N. fischeri* NRRL 181 downloaded from the *Aspergillus*  
519 Genome Database (<http://www.aspgd.org/>) (Cerqueira et al., 2014). The  
520 completeness of draft genomes and predicted proteins was evaluated by

521 BUSCO (ver. 4.0.6) (Seppey et al., 2019) with the database eurotiales\_odb10.

522 Most tools were obtained through Bioconda (Grüning et al., 2018).

523

#### 524 ***Detection of orthologous genes***

525 Orthologous relationships with *A. fumigatus* Af293 were determined by RBH with  
526 criteria BLASTp (ver. 2.9.0+) coverage >80% and identity >80% (Camacho et al.,  
527 2009).

528

#### 529 ***Visualization of genome-wide distribution of SNPs and orthologous genes***

530 SNP frequency in each 1-kb window was calculated and plotted in 250-bp steps  
531 using Python (Van Rossum and Drake 2009) and R (R Core Team 2019) scripts.  
532 The orthologous genes of *A. fumigatus* Af293 in each strain were visualized by R  
533 script.

534

#### 535 **Data availability**

536 The genome sequencing data are deposited to DDBJ as DRA011961.

537 BioSample accession(s): SAMD00322244-SAMD00322251.

538

539 **Author contributions:** HT and DH designed the research; HT, SO, YK, SU, and  
540 DH performed experiments; HT contributed new materials/tools; HT and DH  
541 analyzed data; and HT and DH wrote the manuscript.

542

#### 543 **ACKNOWLEDGMENTS**

544 This study was supported by a grant from the Institute for Fermentation, Osaka  
545 (to DH). HT was partly supported by the National Bioscience Database Center  
546 (NBDC) of the Japan Science and Technology Agency (JST), and JSPS  
547 KAKENHI Grant Numbers 21K07001 and 16H06279. DH and HT were partly

548 supported by AMED, Grant Number JP19fm0208024. We thank Edanz  
549 (<https://jp.edanz.com/ac>) for editing a draft of this manuscript. The authors  
550 declare no competing interest.

551

## 552 **Figure legends**

553 **Fig. 1.** Colony growth of *Aspergillus fumigatus* strains isolated from a single tulip  
554 bulb on potato-dextrose-agar (PDA) containing azoles. (A) Growth on PDA  
555 containing voriconazole (VRCZ). Each strain was inoculated on PDA with  
556 dimethylsulfoxide (DMSO) as a control or 10 µg/ml VRCZ, and was incubated for  
557 48 h. (B) Growth on PDA containing demethylase inhibitors (DMIs). Each strain  
558 was inoculated on PDA with DMSO as a control or 10 µg/ml DMI, and was  
559 incubated for 48 h. (C) Colony diameter on PDA containing VRCZ or DMIs. Each  
560 strain was inoculated on PDA with DMSO as a control or 10 µg/ml azole, and  
561 incubated for 28 h. Error bars represent standard deviations based on three  
562 independent replicates.

563

564 **Fig. 2.** Gene expression analysis by quantitative real-time (qRT)-PCR.  
565 Expression levels of *cyp51A* (A) and *cdr1B* (B) were determined in the eight  
566 strains isolated from a single tulip bulb. The strains were cultured in  
567 potato-dextrose broth for 18 h. The *actin* gene was used as an internal control.  
568 Error bars represent standard deviations based on three independent replicates.

569

570 **Fig. 3.** Microsatellite-typing analysis of *A. fumigatus* strains with tandem repeat  
571 (TR) mutations. The dendrogram was constructed using short tandem repeat for  
572 *A. fumigatus* (STRAf) patterns of the strains. The nine STR panels are shown.  
573 The strains listed refer to the literature (Chen et al, 2019, Hagiwara et al, 2016b,  
574 Nakano et al, 2020, Hagiwara, 2020). The names of strains isolated from plant  
575 bulbs in this study or other study are highlighted in pale blue or yellow,



576 respectively. Cyp51A alleles with TR<sub>34</sub> are indicated in red, and those with TR<sub>46</sub>  
577 in blue.

578

579 **Fig. 4.** Phylogenetic trees constructed using mitochondrial (A) and nuclear (B)  
580 genomes. The trees were constructed using genomes of strains isolated from a  
581 single tulip bulb (3-1-A to 3-1-H) or clinically isolated in a previous study  
582 (Takahashi-Nakaguchi et al, 2016), as well as *A. fumigatus* reference strain  
583 Af293.

584

585 **Fig. 5.** Differences in patterns of single nucleotide polymorphism (SNP)  
586 frequency among the strains isolated from a single tulip bulb. (A) The SNP  
587 presence patterns are compared in certain regions on chromosome 5 (5-A, 5-B,  
588 and 5-C). (B) The patterns in each region could typically be divided into two  
589 groups, which are indicated by yellow or blue panels. Ten genomic loci are  
590 shown and compared among the eight strains.

591

592 **Fig. 6.** Visualization of genome-wide orthologous gene content in the strains  
593 isolated from a single tulip bulb. Orthologous genes were searched against the  
594 reference genome of *A. fumigatus* strain Af293. The presence of an ortholog is  
595 indicated by colored ribbons for each strain (3-1-A to 3-1-H). Some regions are  
596 enlarged to enable easier comparison of the patterns of gene content.

597

598 **Fig. 7.** Colony growth of *A. fumigatus* isolated from a single tulip bulb on PDA  
599 containing fungicide. (A) Growth on PDA containing fungicide. Each strain was  
600 inoculated onto PDA with DMSO as a control, or QoI (pyraclostrobin; 10 µg/ml),  
601 SDHI (boscalid; 2.5 µg/ml), methyl benzimidazole carbamate (carbendazim; 5  
602 µg/ml), or phenylpyrrole (fludioxonil; 0.2 µg/ml), and incubated for 48 h. (B)  
603 Colony diameter on PDA containing fungicide. Each strain was incubated for 30

604 h. Error bars represent standard deviations based on three independent  
605 replicates. (C) Amino acid substitutions detected in CytB and TubA of *A.*  
606 *fumigatus* strains isolated from a tulip bulb.

607

## 608 **Supporting Information**

609 **Figure S1.** Genome-wide SNP frequency compared among the eight strains  
610 (3-1-A to 3-1-H). The 10 regions where the pattern is characteristically distinct  
611 among the strains are marked by red boxes.

612

## 613 **References**

- 614 Ahangarkani, F., Badali, H., Abbasi, K., Nabili, M., Khodavaisy, S., de Groot, T., and Meis, J.F.  
615 (2020) Clonal Expansion of Environmental Triazole Resistant *Aspergillus fumigatus* in Iran. *J*  
616 *Fungi (Basel)* **6**: 199.
- 617  
618 Ahangarkani, F., Puts, Y., Nabili, M., Khodavaisy, S., Moazeni, M., Salehi, Z, *et al.* (2020) First  
619 azole-resistant *Aspergillus fumigatus* isolates with the environmental TR<sub>46</sub>/Y121F/T289A  
620 mutation in Iran. *Mycoses* **63**: 430–436.
- 621  
622 Saldanha, A.J. (2004) Java Treeview—extensible visualization of microarray data,  
623 *Bioinformatics* **20**: 3246–3248.
- 624  
625 Alvarez-Moreno, C., Lavergne, R.A., Hagen, F., Morio, F., Meis, J.F., and Le Pape, P. (2017)  
626 Azole-resistant *Aspergillus fumigatus* harboring TR<sub>34</sub>/L98H, TR<sub>46</sub>/Y121F/T289A and TR<sub>53</sub>  
627 mutations related to flower fields in Colombia. *Sci Rep* **7**: 45631.
- 628  
629 Arora, D.S., and Kaur, N. (2019) Antimicrobial Potential of Fungal Endophytes from *Moringa*  
630 *oleifera*. *Appl Biochem Biotechnol* **187**: 628–648.
- 631  
632 Bellete, B., Raberin, H., Morel, J., Flori, P., Hafid, J., and Manh Sung, R.T. (2010) Acquired  
633 resistance to voriconazole and itraconazole in a patient with pulmonary aspergilloma. *Med Mycol*  
634 **48**: 197–200.
- 635  
636 Berger, S., El Chazli, Y., Babu, A.F., and Coste, A.T. (2017) Azole Resistance in *Aspergillus*  
637 *fumigatus*: A Consequence of Antifungal Use in Agriculture? *Front Microbiol* **8**: 1024.
- 638  
639 Bernt, M., Donath, A., Jühling, F., Externbrink, F., Florentz, C., Fritsch, G., *et al.* (2012) MITOS:  
640 improved de novo metazoan mitochondrial genome annotation. *Mol Phylogenet Evol* **69**:  
641 313–319.
- 642

- 643 Bolton, M.D., Rivera, V., and Secor, G. (2013) Identification of the G143A mutation associated  
644 with QoI resistance in *Cercospora beticola* field isolates from Michigan, United States. *Pest*  
645 *Manag Sci* **69**: 35–39.  
646
- 647 Buil, J.B., Hagen, F., Chowdhary, A., Verweij, P.E., and Meis, J.F. (2018) Itraconazole,  
648 Voriconazole, and Posaconazole CLSI MIC Distributions for Wild-Type and Azole-Resistant  
649 *Aspergillus fumigatus* Isolates. *J Fungi (Basel)* **4**: 103.  
650
- 651 Camacho, C., Coulouris, G., Avagyan, V., Ma, N., Papadopoulos, J., Bealer, K., and Madden, T.  
652 L. (2009) BLAST+: architecture and applications. *BMC Bioinformatics* **10**: 421. doi:  
653 10.1186/1471-2105-10-421  
654
- 655 Camps, S.M., Dutilh, B.E., Arendrup, M.C., Rijs, A.J., Snelders, E., Huynen, M.A., *et al.* (2012)  
656 Discovery of a HapE mutation that causes azole resistance in *Aspergillus fumigatus* through  
657 whole genome sequencing and sexual crossing. *PLoS One* **7**: e50034.  
658
- 659 Cao, D., Wang, F., Yu, S., Dong, S., Wu, R., Cui, N., *et al.* (2021) Prevalence of Azole-Resistant  
660 *Aspergillus fumigatus* is Highly Associated with Azole Fungicide Residues in the Fields. *Environ*  
661 *Sci Technol* **55**: 3041–3049.  
662
- 663 Cao, D., Wu, R., Dong, S., Wang, F., Ju, C., Yu, S., *et al.* (2020) Five-Year Survey (2014 to  
664 2018) of Azole Resistance in Environmental *Aspergillus fumigatus* Isolates from China.  
665 *Antimicrob Agents Chemother* **64**: e00904-20.  
666
- 667 Cerqueira, G.C., Arnaud, M.B., Inglis, D.O., Skrzypek, M.S., Binkley, G., Simison, M., *et al.* (2014).  
668 The *Aspergillus* Genome Database: multispecies curation and incorporation of RNA-Seq data to  
669 improve structural gene annotations. *Nucl Acids Res* **42**: D705–D710.  
670
- 671 Chen, Y.C., Kuo, S.F., Wang, H.C., Wu, C.J., Lin, Y.S., Li, W.S., and Lee, C.H. (2019) Azole  
672 resistance in *Aspergillus* species in Southern Taiwan: An epidemiological surveillance study.  
673 *Mycoses* **62**: 1174–1181.  
674
- 675 Chen, S., Zhou, Y., Chen, Y., and Gu, J. (2018) fastp: an ultra-fast all-in-one FASTQ  
676 preprocessor. *Bioinformatics* **34**: i884–i890.  
677
- 678 Chowdhary, A., Kathuria, S., Xu, J., Sharma, C., Sundar, G., Singh, P.K., *et al.* (2012) Clonal  
679 expansion and emergence of environmental multiple-triazole-resistant *Aspergillus fumigatus*  
680 strains carrying the TR<sub>3,4</sub>/L98H mutations in the *cyp51A* gene in India. *PLoS One* **7**: e52871.  
681
- 682 Dunne, K., Hagen, F., Pomeroy, N., Meis, J.F., and Rogers, T.R. (2017) Intercountry Transfer of  
683 Triazole-Resistant *Aspergillus fumigatus* on Plant Bulbs. *Clin Infect Dis* **65**: 147–149.  
684
- 685 Fisher, M.C., Hawkins, N.J., Sanglard, D., and Gurr, S.J. (2018) Worldwide emergence of  
686 resistance to antifungal drugs challenges human health and food security. *Science* **360**:  
687 739–742.  
688

- 689 Fraaije, B., Atkins, S., Hanley, S., Macdonald, A., and Lucas, J. (2020) The Multi-Fungicide  
690 Resistance Status of *Aspergillus fumigatus* Populations in Arable Soils and the Wider European  
691 Environment. *Front Microbiol* **11**: 599233.  
692
- 693 Fraczek, M.G., Bromley, M., Buied, A., Moore, C.B., Rajendran, R., Rautemaa, R., *et al.* (2013)  
694 The *cdr1B* efflux transporter is associated with non-*cyp51a*-mediated itraconazole resistance in  
695 *Aspergillus fumigatus*. *J Antimicrob Chemother* **68**: 1486–1496.  
696
- 697 Francisco, J.C.E., Rivera, W.L., and Vital, P.G. (2020) Influences of carbohydrate, nitrogen, and  
698 phosphorus sources on the citric acid production by fungal endophyte *Aspergillus fumigatus*  
699 P316. *Prep Biochem Biotechnol* **50**: 292–301.  
700
- 701 Gnerre, S., Maccallum, I., Przybylski, D., Ribeiro, F.J., Burton, J.N., Walker, B.J., *et al.* (2011).  
702 High-quality draft assemblies of mammalian genomes from massively parallel sequence data.  
703 *Proc Natl Acad Sci U. S. A.* **108**: 1513–1518.  
704
- 705 Grüning, B., Dale, R., Sjödin, A., Chapman, B.A., Rowe, J., Tomkins-Tinch, C. H., *et al.* (2018).  
706 Bioconda: sustainable and comprehensive software distribution for the life sciences. *Nat Methods*  
707 **15**: 475–476.  
708
- 709 Hagiwara, D., Miura, D., Shimizu, K., Paul, S., Ohba, A., Gonoï, T., *et al.* (2017) A Novel  
710 Zn<sup>2+</sup>-Cys<sup>6</sup> Transcription Factor AtrR Plays a Key Role in an Azole Resistance Mechanism of  
711 *Aspergillus fumigatus* by Co-regulating *cyp51A* and *cdr1B* Expressions. *PLoS Pathog* **13**:  
712 e1006096.  
713
- 714 Hagiwara, D., Takahashi, H., Fujimoto, M., Sugahara, M., Misawa, Y., Gonoï, T., *et al.* (2016b)  
715 Multi-azole resistant *Aspergillus fumigatus* harboring Cyp51A TR<sub>46</sub>/Y121F/T289A isolated in  
716 Japan. *J Infect Chemother* **22**: 577–579.  
717
- 718 Hagiwara, D., Takahashi, H., Watanabe, A., Takahashi-Nakaguchi, A., Kawamoto, S., Kamei, K.,  
719 and Gonoï, T. (2014) Whole-genome comparison of *Aspergillus fumigatus* strains serially  
720 isolated from patients with aspergillosis. *J Clin Microbiol* **52**: 4202–4209.  
721
- 722 Hagiwara, D., Watanabe, A., Kamei, K., and Goldman, G.H. (2016a) Epidemiological and  
723 genomic landscape of azole resistance mechanisms in *Aspergillus* fungi. *Front Microbiol* **21**:  
724 1382.  
725
- 726 Hagiwara, D. (2020) Isolation of azole-resistant *Aspergillus fumigatus* from imported plant bulbs  
727 in Japan and the effect of fungicide treatment. *J Pestic Sci* **45**: 147–150.  
728
- 729 Hagiwara, D., Arai, T., Takahashi, H., Kusuya, Y., Watanabe, A., and Kamei, K. (2018)  
730 Non-*cyp51A* Azole-Resistant *Aspergillus fumigatus* Isolates with Mutation in HMG-CoA  
731 Reductase. *Emerg Infect Dis* **24**: 1889–1897.  
732
- 733 Hortschansky, P., Misslinger, M., Mörl, J., Gsaller, F., Bromley, M.J., Brakhage, A.A., *et al.*  
734 (2020) Structural basis of HapE<sup>P88L</sup>-linked antifungal triazole resistance in *Aspergillus fumigatus*.  
735 *Life Sci Alliance* **3**: e202000729.  
736

- 737 Howard, S.J., Cerar, D., Anderson, M.J., Albarrag, A., Fisher, M.C., Pasqualotto, A.C., *et al.*  
738 (2009) Frequency and evolution of Azole resistance in *Aspergillus fumigatus* associated with  
739 treatment failure. *Emerg Infect Dis.* **15**: 1068–1076.  
740
- 741 Ian, K. (2004). Gene finding in novel genomes. *BMC Bioinformatics* **5**: 59.  
742
- 743 Jeanvoine, A., Rocchi, S., Bellanger, A.P., Reboux, G., and Millon, L. (2020) Azole-resistant  
744 *Aspergillus fumigatus*: A global phenomenon originating in the environment? *Med Mal Infect* **50**:  
745 389–395.  
746
- 747 Jenks, J.D., and Hoenigl, M. (2018) Treatment of Aspergillosis. *J Fungi (Basel)* **4**: 98.  
748
- 749 Jin, J.J., Yu, W.B., Yang, J.B., Song, Y., de Pamphilis, C.W., Yi, T.S., *et al.* (2020).  
750 GetOrganelle: a fast and versatile toolkit for accurate de novo assembly of organelle genomes.  
751 *Genome Biol* **21**: 241.  
752
- 753 Katoh, K., and Standley, D. M. (2013). MAFFT multiple sequence alignment software version 7:  
754 improvements in performance and usability. *Mol Biol Evol* **30**: 772–780.  
755
- 756 Klaassen, C.H.W., de Valk, H.A., Balajee, S.A., and Meis, J.F.G.M. (2009) Utility of CSP typing  
757 to sub-type clinical *Aspergillus fumigatus* isolates and proposal for a new CSP type  
758 nomenclature. *J Microbiol Methods* **77**: 292–296.  
759
- 760 Klaassen, C.H.W., Gibbons, J.G., Fedorova, N.D., Meis, J.F., and Rokas, A. (2012) Evidence for  
761 genetic differentiation and variable recombination rates among Dutch populations of the  
762 opportunistic human pathogen *Aspergillus fumigatus*. *Mol Ecol* **21**: 57–70.  
763
- 764 Lestrade, P.P.A., Meis, J.F., Melchers, W.J.G., and Verweij, P.E. (2019) Triazole resistance in  
765 *Aspergillus fumigatus*: recent insights and challenges for patient management. *Clin Microbiol*  
766 *Infect* **25**: 799–806.  
767
- 768 Letunic, I., and Bork, P. (2019). Interactive Tree Of Life (iTOL) v4: recent updates and new  
769 developments. *Nucl. Acids Res.* **47**, W256–W259.  
770
- 771 Li, S., Chen, J.F., Qin, L.L., Li, X.H., Cao, Z.X., Gu, Y.C., *et al.* (2020) Two new sesquiterpenes  
772 produced by the endophytic fungus *Aspergillus fumigatus* from *Ligusticum wallichii*. *J Asian Nat*  
773 *Prod Res* **22**: 138–143.  
774
- 775 Li, H., Handsaker, B., Wysoker, A., Fennell, T., Ruan, J., Homer, N., *et al.* (2009). The Sequence  
776 Alignment/Map format and SAMtools. *Bioinformatics* **25**: 2078–2079.  
777
- 778 Li, H., and Durbin, R. (2009) Fast and accurate short read alignment with Burrows-Wheeler  
779 transform. *Bioinformatics* **25**: 1754–1760.  
780
- 781 Majoros, W.H., Pertea, M., and Salzberg, S.L. (2004). TigrScan and GlimmerHMM: two open  
782 source ab initio eukaryotic gene-finders. *Bioinformatics* **20**: 2878–2879.  
783

- 784 McKenna, A., Hanna, M., Banks, E., Sivachenko, A., Cibulskis, K., Kernytsky, A., *et al.* (2010)  
785 The Genome Analysis Toolkit: a MapReduce framework for analyzing next-generation DNA  
786 sequencing data. *Genome Res* **20**: 1297–1303.  
787
- 788 Nakano, Y., Tashiro, M., Urano, R., Kikuchi, M., Ito, N., Moriya, E., *et al.* (2020) Characteristics of  
789 azole-resistant *Aspergillus fumigatus* attached to agricultural products imported to Japan. *J*  
790 *Infect Chemother* **26**: 1021–1025.  
791
- 792 Ninomiya, A., Urayama, S.I., Suo, R., Itoi, S., Fuji, S.I., Moriyama, H., and Hagiwara, D. (2020)  
793 Mycovirus-Induced Tenuazonic Acid Production in a Rice Blast Fungus *Magnaporthe oryzae*.  
794 *Front Microbiol* **11**: 1641.  
795
- 796 Nywening, A.V., Rybak, J.M., Rogers, P.D., and Fortwendel, J.R. (2020) Mechanisms of triazole  
797 resistance in *Aspergillus fumigatus*. *Environ Microbiol* **22**: 4934–4952.  
798
- 799 O’Gorman, C.M., Fuller, H.T., and Dyer, P.S. (2009) Discovery of a sexual cycle in the  
800 opportunistic fungal pathogen *Aspergillus fumigatus*. *Nature* **457**: 471–474.  
801
- 802 Pontes, L., Beraquet, C.A.G., Arai, T., Pigolli, G.L., Lyra, L., Watanabe, A., *et al.* (2020)  
803 *Aspergillus fumigatus* Clinical Isolates Carrying CYP51A with TR<sub>34</sub>/L98H/S297T/F495I  
804 Substitutions Detected after Four-Year Retrospective Azole Resistance Screening in Brazil.  
805 *Antimicrob Agents Chemother* **64**: e02059-19.  
806
- 807 Price, C.L., Parker, J.E., Warrilow, A.G., Kelly, D.E., and Kelly, S.L. (2015) Azole  
808 fungicides - understanding resistance mechanisms in agricultural fungal pathogens. *Pest Manag*  
809 *Sci* **71**: 1054–1058.  
810
- 811 Qin, W., Liu, C., Jiang, W., Xue, Y., Wang, G., and Liu, S. (2019) A coumarin analogue NFA  
812 from endophytic *Aspergillus fumigatus* improves drought resistance in rice as an antioxidant.  
813 *BMC Microbiol* **19**: 50.  
814
- 815 R Core Team (2019). R: A language and environment for statistical computing. R Foundation for  
816 Statistical Computing, Vienna, Austria. URL <https://www.R-project.org/>.  
817
- 818 Resendiz Sharpe, A., Lagrou, K., Meis, J.F., Chowdhary, A., Lockhart, S.R., and Verweij, P.E.  
819 (2018) ISHAM/ECMM *Aspergillus* Resistance Surveillance working group. Triazole resistance  
820 surveillance in *Aspergillus fumigatus*. *Med Mycol* **56**(suppl\_1): 83–92.  
821
- 822 Rybak, J.M., Ge, W., Wiederhold, N.P., Parker, J.E., Kelly, S.L., Rogers, P.D., and Fortwendel,  
823 J.R. (2019) Mutations in *hmg1*, Challenging the Paradigm of Clinical Triazole Resistance in  
824 *Aspergillus fumigatus*. *mBio* **10**: e00437-19.  
825
- 826 Samuel, S., Papayiannis, L.C., Leroy, M., Veloukas, T., Hahn, M., and Karaoglanidis, G.S.  
827 (2011) Evaluation of the incidence of the G143A mutation and *cytb* intron presence in the  
828 cytochrome bc-1 gene conferring QoI resistance in *Botrytis cinerea* populations from several  
829 hosts. *Pest Manag Sci* **67**: 1029–1036.  
830

- 831 Schoustra, S.E., Debets, A.J.M., Rijs, A.J.M.M., Zhang, J., Snelders, E., Leendertse, P.C., *et al.*  
832 (2019) Environmental Hotspots for Azole Resistance Selection of *Aspergillus fumigatus*, the  
833 Netherlands. *Emerg Infect Dis* **25**: 1347–1353.  
834
- 835 Seppey, M., Manni, M., and Zdobnov, E.M. (2019). BUSCO: assessing genome assembly and  
836 annotation completeness. *Methods Mol Biol* **1962**: 227–245.  
837
- 838 Sewell, T.R., Zhu, J., Rhodes, J., Hagen, F., Meis, J.F., Fisher, M.C., and Jombart, T. (2019)  
839 Nonrandom Distribution of Azole Resistance across the Global Population of *Aspergillus*  
840 *fumigatus*. *mBio* **10**: e00392-19.  
841
- 842 Shen, W., Le, S., Li, Y., and Hu, F. (2016). SeqKit: A cross-platform and ultrafast toolkit for  
843 FASTA/Q file manipulation. *PLoS ONE* **11**: e0163962.  
844
- 845 Snelders, E., Camps, S.M., Karawajczyk, A., Schaftenaar, G., Kema, G.H., van der Lee, H.A., *et*  
846 *al.* (2012) Triazole fungicides can induce cross-resistance to medical triazoles in *Aspergillus*  
847 *fumigatus*. *PLoS One* **7**: e31801.  
848
- 849 Stamatakis, A. (2014). RAxML version 8: a tool for phylogenetic analysis and post-analysis of  
850 large phylogenies. *Bioinformatics* **30**: 1312–1313.  
851
- 852 Stanke, M., Schöffmann, O., Morgenstern, B., and Waack, S. (2006) Gene prediction in  
853 eukaryotes with a generalized hidden Markov model that uses hints from external sources. *BMC*  
854 *Bioinformatics* **7**: 62.  
855
- 856 Suzuki, S., Horinouchi, T., and Furusawa, C. (2014) Prediction of antibiotic resistance by gene  
857 expression profiles. *Nat Commun* **5**: 5792.  
858
- 859 Takahashi-Nakaguchi, A., Muraosa, Y., Hagiwara, D., Sakai, K., Toyotome, T., Watanabe, A., *et*  
860 *al.* (2015) Genome sequence comparison of *Aspergillus fumigatus* strains isolated from patients  
861 with pulmonary aspergilloma and chronic necrotizing pulmonary aspergillois. *Med Mycol* **53**:  
862 353–360.  
863
- 864 Takahashi, H., Umemura, M., Ninomiya, A., Kusuya, Y., Shimizu, M., Urayama, S., *et al.* (2021)  
865 Interspecies Genomic Variation and Transcriptional Activeness of Secondary  
866 Metabolism-Related Genes in *Aspergillus* Section *Fumigati*. *Front Fungal Biol* **2**: 656751. doi:  
867 10.3389/ffunb.2021.656751  
868
- 869 Tenaillon, O., Rodríguez-Verdugo, A., Gaut, R.L., McDonald, P., Bennett, A.F., Long, A.D., *et al.*  
870 (2012) The molecular diversity of adaptive convergence. *Science* **335**: 457–461.  
871
- 872 Ter-Hovhannisyan, V., Lomsadze, A., Chernoff, Y. O., and Borodovsky, M. (2008) Gene  
873 prediction in novel fungal genomes using an ab initio algorithm with unsupervised training.  
874 *Genome Res* **18**: 1979–1990.  
875
- 876 Toyotome, T., Fujiwara, T., Kida, H., Matsumoto, M., Wada, T., and Komatsu, R. (2016) Azole  
877 susceptibility in clinical and environmental isolates of *Aspergillus fumigatus* from eastern  
878 Hokkaido, Japan. *J Infect Chemother* **22**: 648–650.

879  
880 Wang, H.C., Huang, J.C., Lin, Y.H., Chen, Y.H., Hsieh, M.I., Choi, P.C., *et al.* (2018) Prevalence,  
881 mechanisms and genetic relatedness of the human pathogenic fungus *Aspergillus fumigatus*  
882 exhibiting resistance to medical azoles in the environment of Taiwan. *Environ Microbiol* **20**:  
883 270–280.  
884  
885 Yarden, O., and Katan, T. (1993). Mutations leading to substitutions at amino acid 198 and 200  
886 of beta-tubulin that correlate with benomyl-resistant phenotypes of field strains of *Botrytis*  
887 *cinerea*. *Phytopathology* **83**: 1478–1483.  
888  
889 Zerbino, D.R., and Birney, E. (2008) Velvet: algorithms for de novo short read assembly using de  
890 Bruijn graphs. *Genome Res* **18**: 821–829.  
891  
892 Zhang, J., Lopez Jimenez, L., Snelders, E., Debets, A.J.M., Rietveld, A.G., Zwaan, B.J., *et al.*  
893 (2021) Dynamics of *Aspergillus fumigatus* in Azole Fungicide-Containing Plant Waste in the  
894 Netherlands (2016-2017). *Appl Environ Microbiol* **87**: e02295-20.  
895  
896 Zhang, J., Snelders, E., Zwaan, B.J., Schoustra, S.E., Meis, J.F., van Dijk, K., *et al.* (2017) A  
897 Novel Environmental Azole Resistance Mutation in *Aspergillus fumigatus* and a Possible Role of  
898 Sexual Reproduction in Its Emergence. *mBio* **8**: e00791-17.  
899  
900 Zhou, D., Korfanty, G.A., Mo, M., Wang, R., Li, X., Li, H., *et al.* (2021) Extensive Genetic  
901 Diversity and Widespread Azole Resistance in Greenhouse Populations of *Aspergillus fumigatus*  
902 in Yunnan, China. *mSphere* **6**: e00066-21.  
903  
904 Zhou, Z., Duan, Y., and Zhou, M. (2020) Carbendazim-resistance associated  $\beta_2$ -tubulin  
905 substitutions increase deoxynivalenol biosynthesis by reducing the interaction between  $\beta_2$ -  
906 tubulin and IDH3 in *Fusarium graminearum*. *Environ Microbiol* **22**: 598–614.  
907  
908 de Hoon, M.J., Imoto, S., Nolan, J., and Miyano, S. (2004) Open source clustering software.  
909 *Bioinformatics* **20**: 1453–1454.  
910  
911 de Valk, H.A., Meis, J.F., Curfs, I.M., Muehlethaler, K., Mouton, J.W., and Klaassen, C.H. (2005)  
912 Use of a novel panel of nine short tandem repeats for exact and high-resolution fingerprinting of  
913 *Aspergillus fumigatus* isolates. *J Clin Microbiol* **43**: 4112–4120.  
914  
915 van Ingen, J., van der Lee, H.A., Rijs, T.A., Zoll, J., Leenstra, T., Melchers, W.J., and Verweij,  
916 P.E. (2015) Azole, polyene and echinocandin MIC distributions for wild-type, TR<sub>34</sub>/L98H and  
917 TR46/Y121F/T289A *Aspergillus fumigatus* isolates in the Netherlands. *J Antimicrob Chemother*  
918 **70**: 178–181.  
919  
920 Van Rossum, G., and Drake, F. L. (2009) Python 3 Reference Manual. Scotts Valley, CA:  
921 CreateSpace.



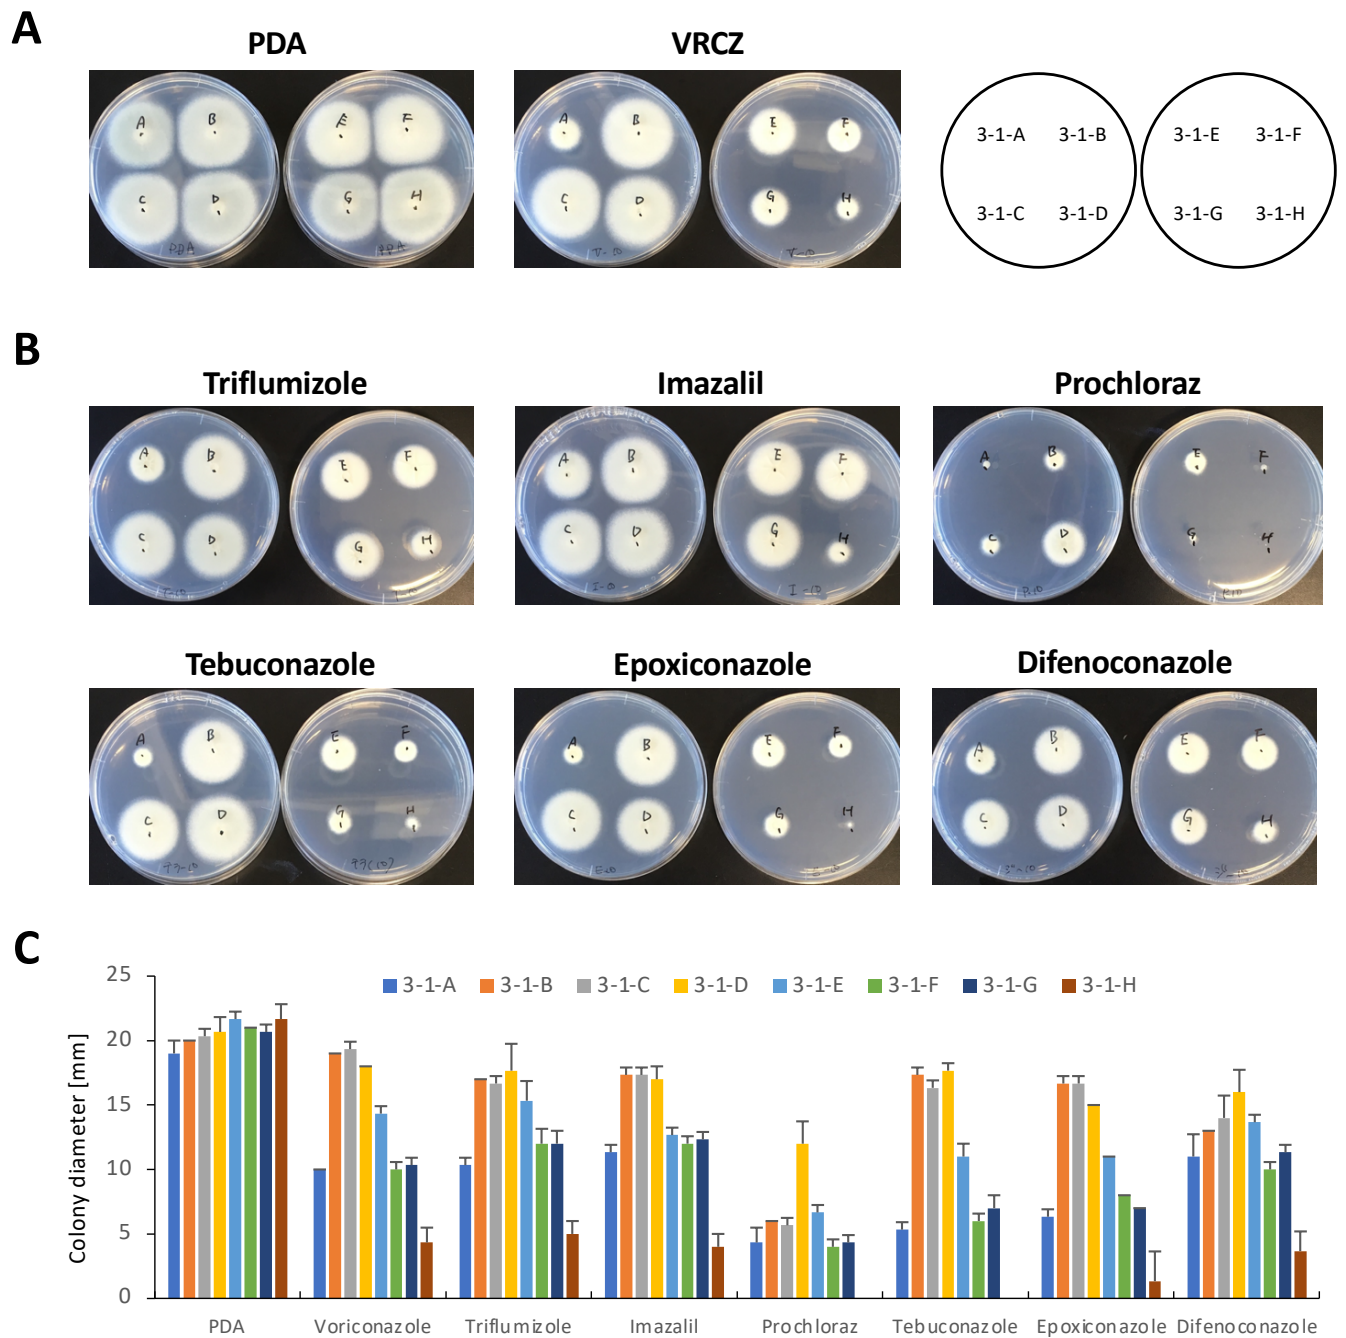

**Fig. 1**

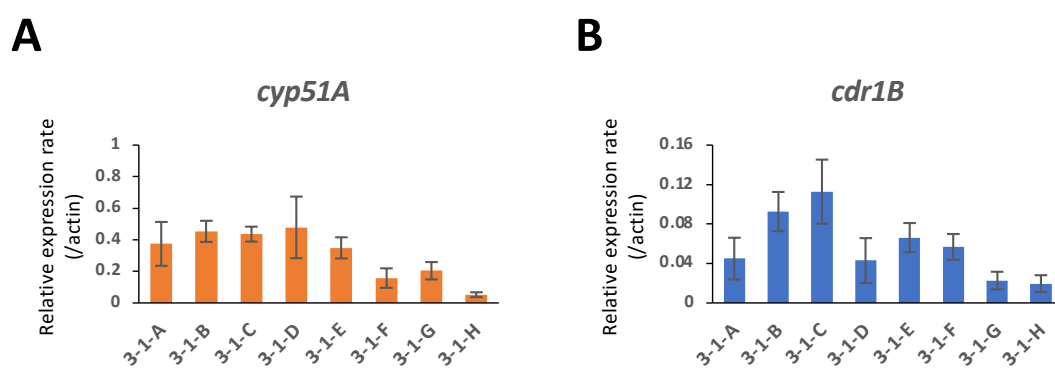

**Fig. 2**

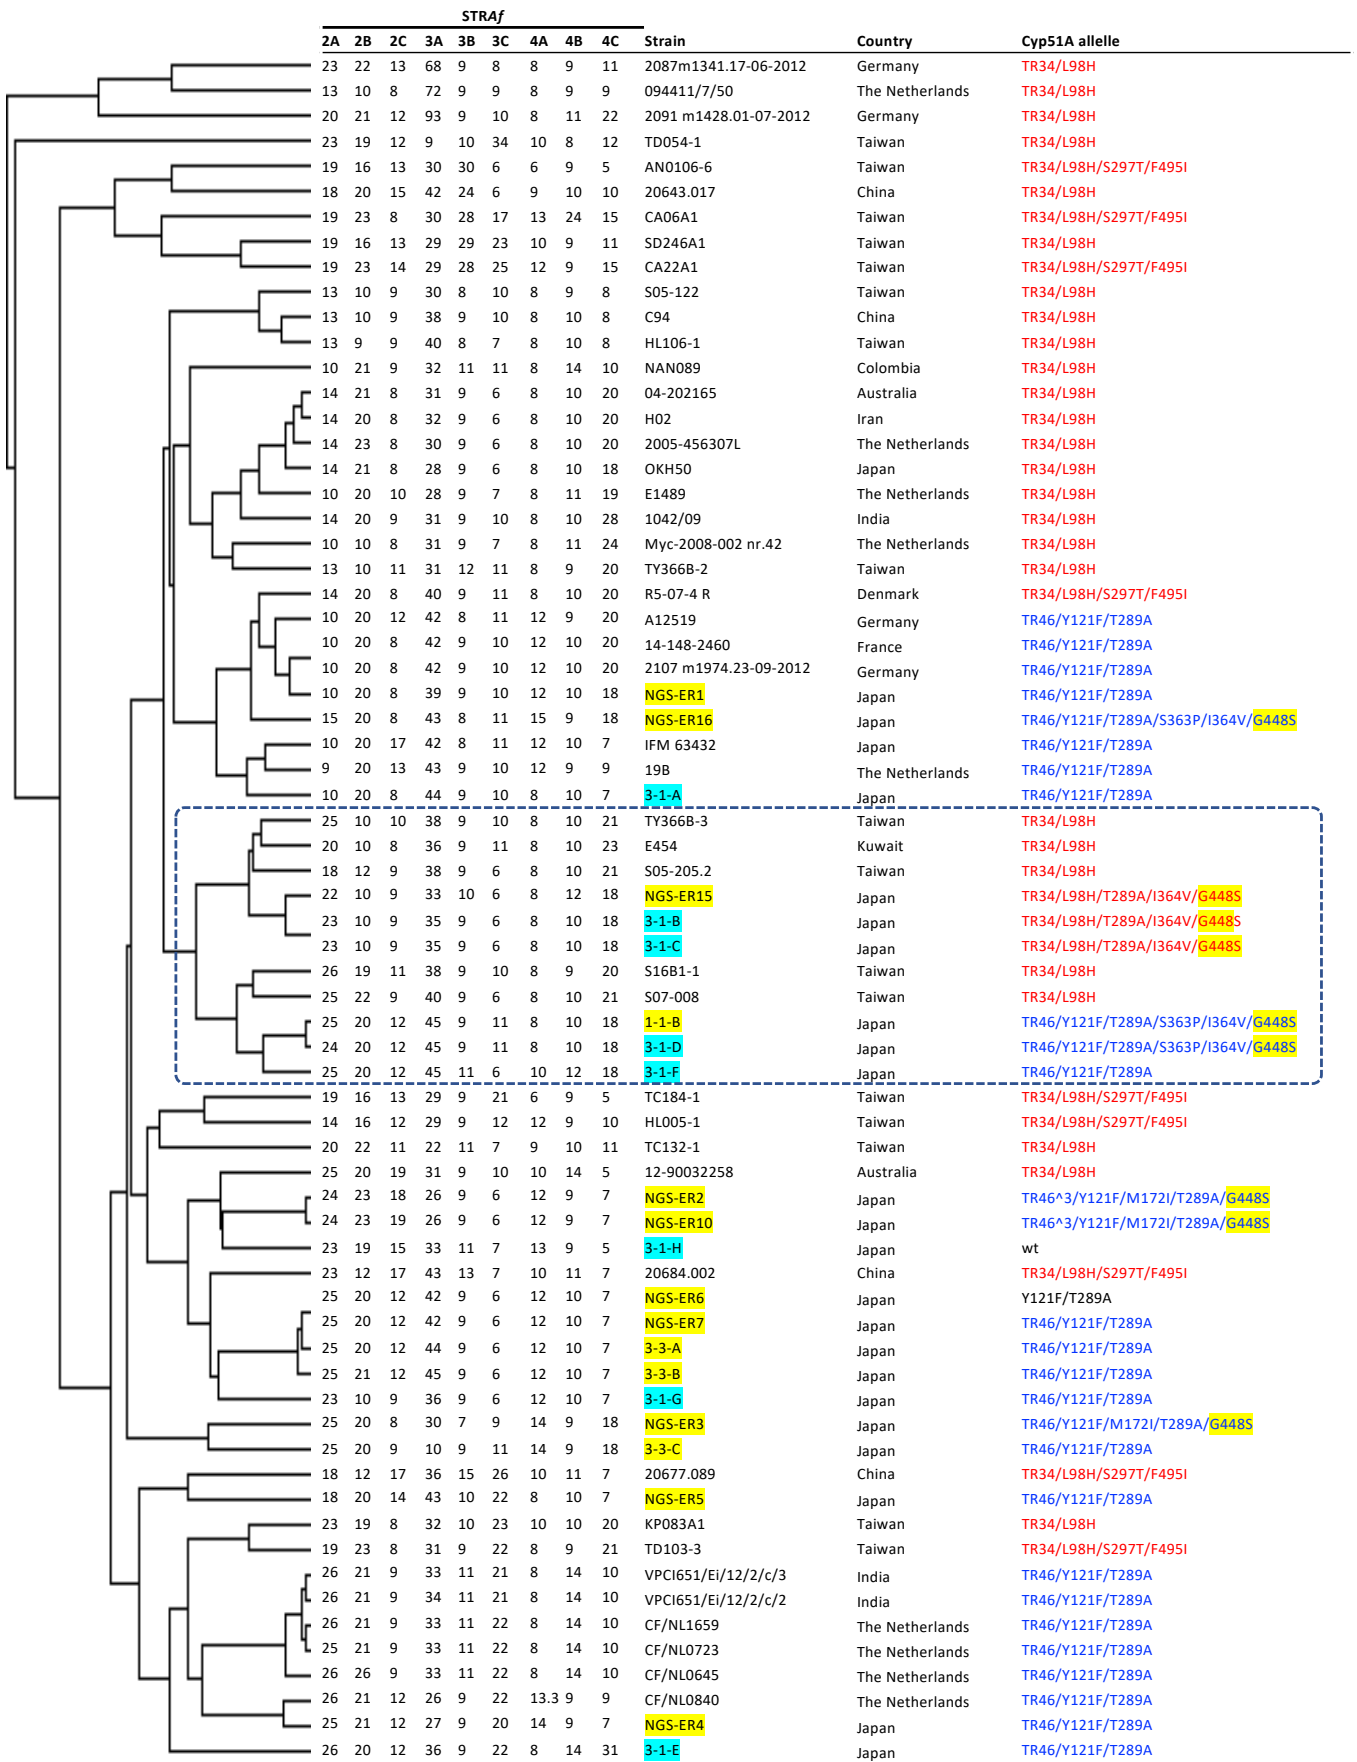

**Fig. 3**

**A**

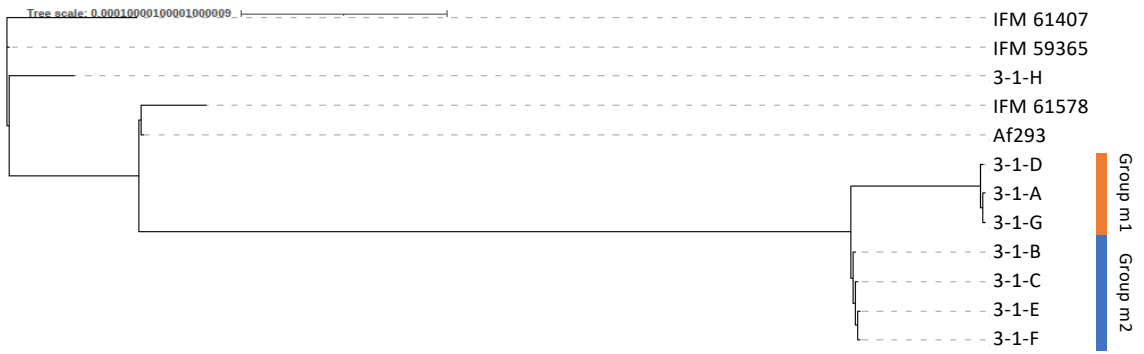

**B**

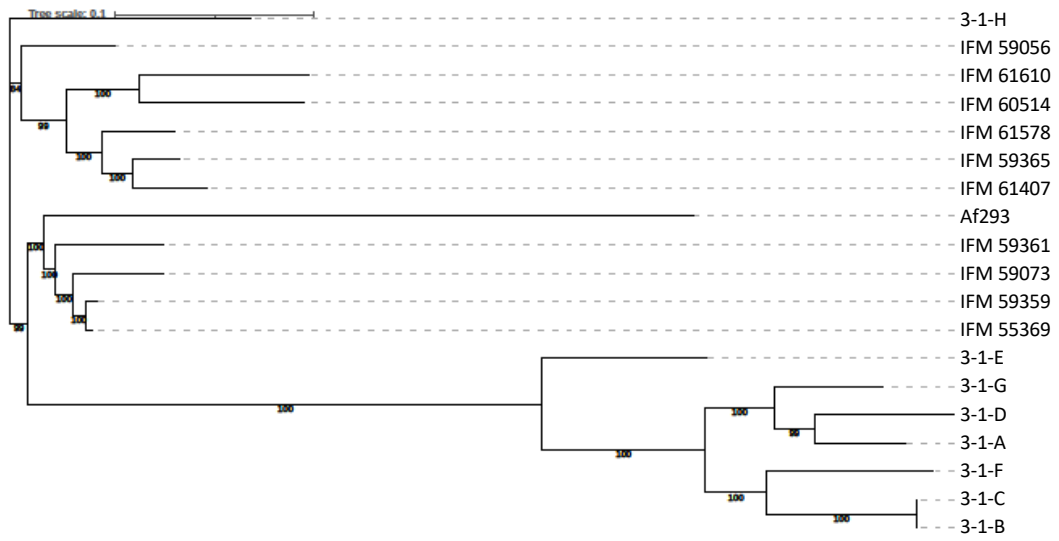

**Fig. 4**

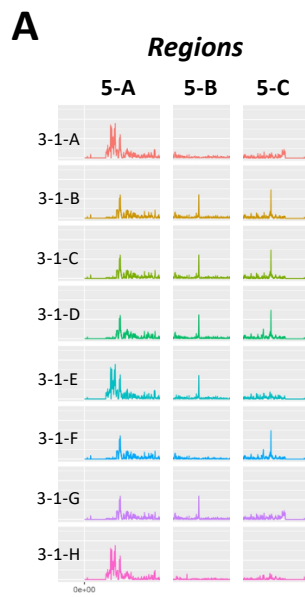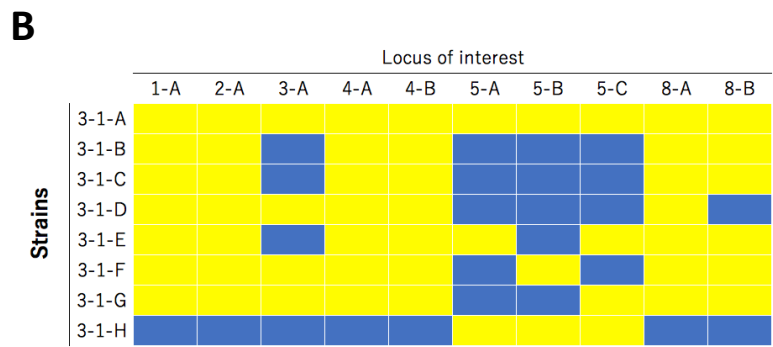

**Fig. 5**

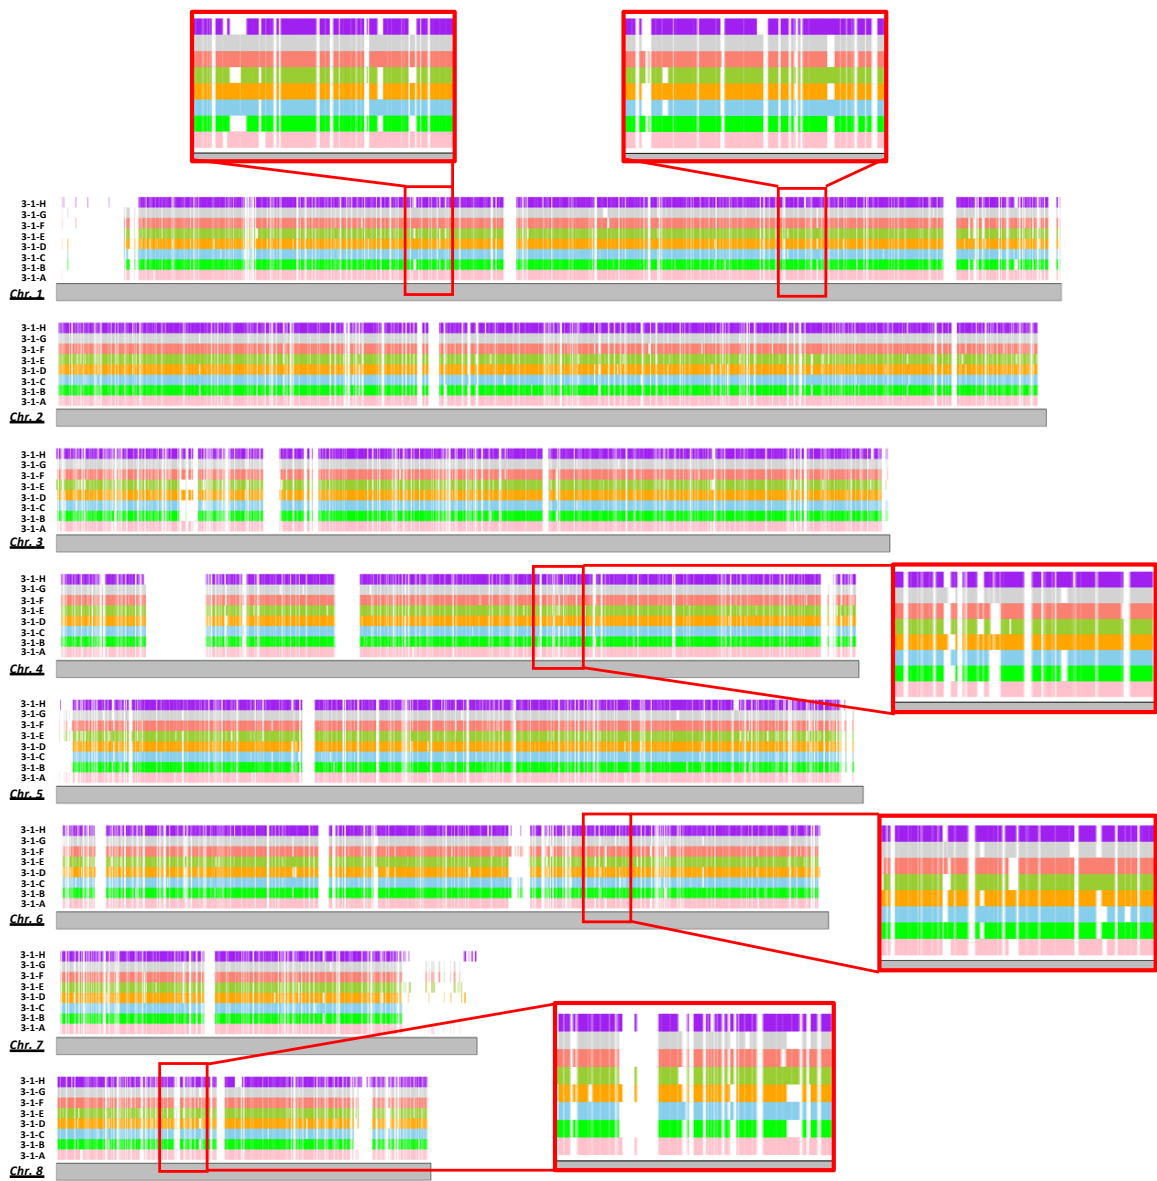

**Fig. 6**

**A**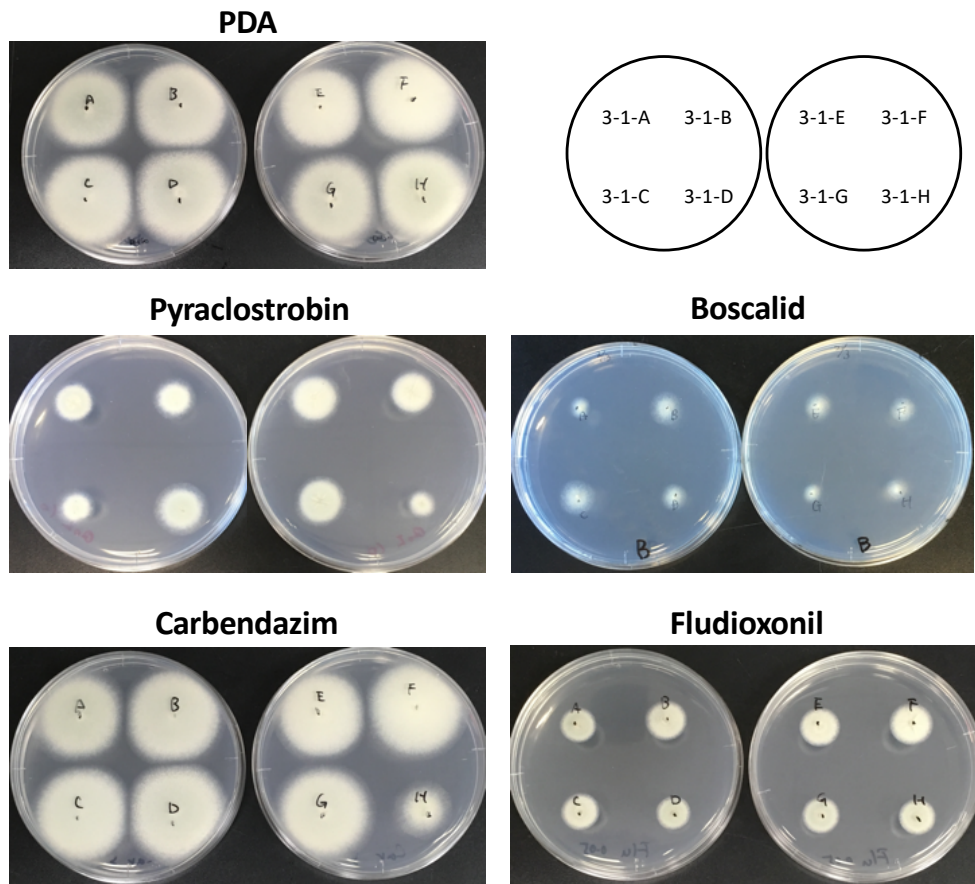**B**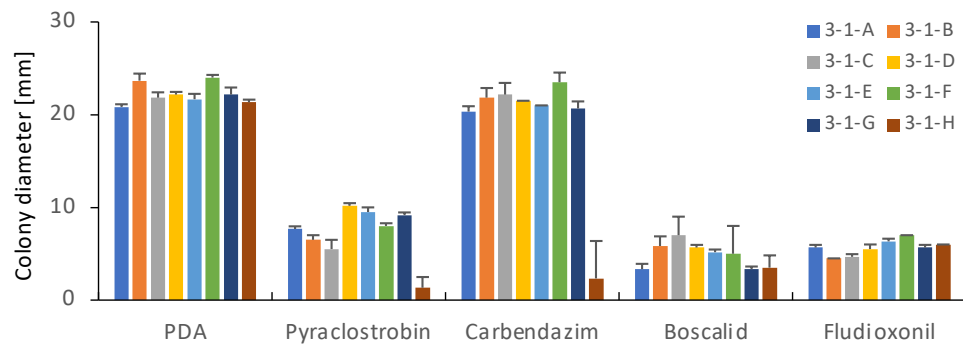**C**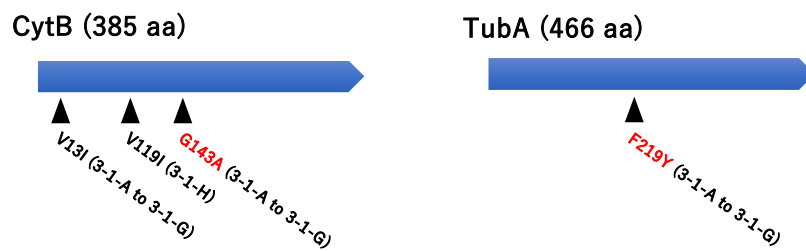**Fig. 7**
